# Supplementary material for: Dependency of Heterochromatin Domains on Replication Factors
Source: PubMed Central journal article supplement (PMC5919735; doi:10.1534/g3.117.300341), 2017-11-29
Supplement: 477FileS1.pdf [file 477FileS1.pdf]

## SUPPLEMENTAL MATERIAL

Table S1 presents a list of Bioneer deletion strains selected for the second and third mutant screens and Table S2 a list of potential false positives. Figure S1 to S8 show the phenotypes of mutants examined in the second screen; Figure S9 to S11 show the phenotypes of mutants examined in the third screen. Table S3 contains a list of strains and their genotypes; Table S4 contains oligonucleotide sequences.

**Table S1.** Bioneer deletion strains selected for second and third screens. -Plate positionørefers to the plate images in Figure S1-8 showing the results of the second screen.

| Deletion strains used in 2 <sup>nd</sup> screen |           |              |                                                                                            | used in 3 <sup>rd</sup> screen | Final list |
|-------------------------------------------------|-----------|--------------|--------------------------------------------------------------------------------------------|--------------------------------|------------|
| Plate position                                  | Bioneer # | ID           | Gene description                                                                           |                                |            |
| A1                                              | V3-P01-05 | SPAC11E3.15  | 60S ribosomal protein L22 (predicted)                                                      |                                |            |
| A2                                              | V3-P01-17 | SPAC1687.23c | sequence orphan                                                                            |                                |            |
| A3                                              | V3-P02-16 | SPAPJ691.03  | mitochondrial conserved eukaryotic protein                                                 |                                |            |
| A4                                              | V3-P02-40 | SPBC1711.01c | mating-type m-specific polypeptide mi 1                                                    |                                |            |
| A5                                              | V3-P02-41 | SPBC1711.02  | mating-type m-specific polypeptide mc 1                                                    |                                |            |
| A6                                              | V3-P02-75 | SPBC4B4.11   | conserved fungal protein                                                                   |                                |            |
| A7                                              | V3-P03-81 | SPAC1687.05  | SUMO E3 ligase Pli1                                                                        | •                              | •          |
| A8                                              | V3-P03-83 | SPAC1687.15  | serine/threonine protein kinase Gsk3                                                       |                                |            |
| A9                                              | V3-P04-23 | SPAC1851.03  | CK2 family regulatory subunit Ckb1                                                         | •                              | •          |
| A10                                             | V3-P04-49 | SPAC227.10   | prefoldin subunit 2 (predicted)                                                            |                                |            |
| A11                                             | V3-P05-23 | SPAC2F7.09c  | mitochondrial GTPase related protein (predicted)                                           | •                              |            |
| A12                                             | V3-P05-24 | SPAC2F7.10   | palmitoyltransferase (predicted)                                                           |                                |            |
| A13                                             | V3-P05-33 | SPAC31G5.19  | ATPase with bromodomain protein Abo1                                                       | •                              | •          |
| A14                                             | V3-P05-52 | SPAC3C7.10   | peroxin 13 (predicted)                                                                     |                                |            |
| A15                                             | V3-P05-57 | SPAC3G6.04   | RNA-binding protein Rnp24                                                                  |                                |            |
| A16                                             | V3-P05-67 | SPAC3H5.12c  | 60S ribosomal protein L5 (predicted)                                                       |                                |            |
| B1                                              | V3-P06-02 | SPAC57A7.12  | heat shock protein Ssz1(predicted)                                                         | •                              | •          |
| B2                                              | V3-P06-05 | SPAC5D6.06c  | UDP-GlcNAc transferase associated protein Alg14 (predicted)                                |                                |            |
| B3                                              | V3-P06-14 | SPAC664.01c  | chromodomain protein Swi6                                                                  | •                              | •          |
| B4                                              | V3-P06-19 | SPAC694.06c  | mediator of replication checkpoint 1                                                       | •                              | •          |
| B5                                              | V3-P06-41 | SPAC824.08   | guanosine-diphosphatase Gda1                                                               |                                |            |
| B6                                              | V3-P06-95 | SPBC12C2.02c | Rictor homolog, Ste20                                                                      |                                |            |
| B7                                              | V3-P07-42 | SPBC1709.14  | peptide N-glycanase (predicted)                                                            |                                |            |
| B8                                              | V3-P07-44 | SPBC1718.06  | mitochondrial dynamin family GTPase Msp1                                                   |                                |            |
| B9                                              | V3-P07-46 | SPBC1734.06  | Rad18 homolog Rhp18                                                                        | •                              |            |
| B10                                             | V3-P07-80 | SPBC19G7.10c | topoisomerase II-associated deadenylation-dependent mRNA-decapping factor Pdc2 (predicted) | •                              |            |
| B11                                             | V3-P08-10 | SPBC23E6.08  | Golgi membrane exchange factor subunit Sat1 (predicted)                                    | •                              |            |
| B12                                             | V3-P08-53 | SPBC336.14c  | serine/threonine protein kinase, PAN complex subunit, Ppk26                                |                                |            |
| B13                                             | V3-P08-63 | SPBC365.04c  | RNA-binding protein, involved in ribosome biogenesis (predicted)                           | •                              |            |

|     |           |               |                                                               |                |                |
|-----|-----------|---------------|---------------------------------------------------------------|----------------|----------------|
| B14 | V3-P09-27 | SPBP16F5.05c  | ribosome biogenesis protein Nop8 (predicted)                  |                |                |
| B15 | V3-P09-30 | SPBP22H7.05c  | ATPase with bromodomain protein Abo2 (predicted)              | • <sup>a</sup> | • <sup>a</sup> |
| B16 | V3-P09-32 | SPBP35G2.10   | SHREC complex subunit Mit1                                    | •              | •              |
| C1  | V3-P09-52 | SPCC1183.02   | glutathione S-transferase (predicted)                         |                |                |
| C2  | V3-P09-54 | SPCC11E10.08  | silencing protein Rik1                                        | •              | •              |
| C3  | V3-P09-69 | SPCC1450.11c  | serine/threonine protein kinase Cek1                          |                |                |
| C4  | V3-P10-07 | SPCC553.08c   | GTPase Ria1 (predicted)                                       |                |                |
| C5  | V3-P10-23 | SPCC74.06     | histidine kinase Mak3                                         |                |                |
| C6  | V3-P10-35 | SPAC10F6.11c  | autophagy associated protein kinase activator Atg17           |                |                |
| C7  | V3-P10-52 | SPAC17H9.10c  | damaged DNA binding protein Ddb1                              | •              | •              |
| C8  | V3-P10-53 | SPAC1805.10   | sequence orphan                                               |                |                |
| C9  | V3-P11-19 | SPAPYUG7.03c  | medial ring protein Mid2                                      |                |                |
| C10 | V3-P11-68 | SPBC800.03    | histone deacetylase (class II) Clr3                           | •              | •              |
| C11 | V3-P11-94 | SPCC338.16    | F-box protein Pof3                                            | •              | •              |
| C12 | V3-P12-13 | SPCPB1C11.03  | cysteine transporter (predicted)                              |                |                |
| C13 | V3-P12-29 | SPAC13A11.06  | pyruvate decarboxylase (predicted)                            |                |                |
| C14 | V3-P12-43 | SPAC1B2.03c   | GNS1/SUR4 family protein (predicted)                          |                |                |
| C15 | V3-P12-46 | SPAC1B3.17    | chromatin silencing protein Clr2                              | •              | •              |
| C16 | V3-P12-69 | SPAC25A8.02   | sequence orphan                                               |                |                |
| D1  | V3-P12-78 | SPAC30D11.05  | AP-3 adaptor complex subunit Aps3 (predicted)                 |                |                |
| D2  | V3-P13-41 | SPBC18E5.01   | cycloisomerase 2 family                                       |                |                |
| D3  | V3-P14-03 | SPCC11E10.05c | nucleoside diphosphatase Ynd1                                 | •              |                |
| D4  | V3-P14-10 | SPCC1322.02   | sequence orphan                                               |                |                |
| D5  | V3-P14-25 | SPCC188.07    | telomere maintenance protein Ccq1                             | •              |                |
| D6  | V3-P14-50 | SPAC11G7.01   | sequence orphan                                               |                |                |
| D7  | V3-P14-52 | SPAC12G12.09  | conserved fungal protein                                      |                |                |
| D8  | V3-P14-53 | SPAC13F5.04c  | endosomal sorting protein (predicted)                         |                |                |
| D9  | V3-P14-69 | SPAC17H9.19c  | WD repeat protein Cdt2                                        | •              | •              |
| D10 | V3-P14-80 | SPAC22F8.07c  | replication termination factor Rtf1                           | •              |                |
| D11 | V3-P15-44 | SPBC14F5.03c  | karyopherin Kap123                                            |                |                |
| D12 | V3-P15-63 | SPBC2D10.17   | cryptic loci regulator Clr1                                   | •              | •              |
| D13 | V3-P15-77 | SPBC428.08c   | histone H3 methyltransferase Clr4                             | •              | •              |
| D14 | V3-P15-80 | SPBC4F6.11c   | asparagine synthase (predicted)                               |                |                |
| D15 | V3-P16-15 | SPCC306.11    | sequence orphan                                               |                |                |
| D16 | V3-P16-20 | SPCC4G3.15c   | CCR4-Not complex subunit Not2 (predicted)                     | •              | •              |
| E1  | V3-P16-29 | SPCC965.05c   | uracil DNA N-glycosylase Thp1                                 | •              |                |
| E2  | V3-P16-66 | SPAC31G5.09c  | MAP kinase Spk1                                               |                |                |
| E3  | V3-P17-85 | SPCC757.09c   | RNA-binding protein that suppresses calcineurin deletion Rnc1 | •              |                |

|     |           |               |                                                                  |   |   |
|-----|-----------|---------------|------------------------------------------------------------------|---|---|
| E4  | V3-P18-15 | SPAC19D5.02c  | peroxisomal membrane protein Pex22 (predicted)                   |   |   |
| E5  | V3-P18-50 | SPAPB24D3.08c | NADP-dependent oxidoreductase (predicted)                        |   |   |
| E6  | V3-P18-68 | SPBC28F2.02   | mRNA export protein Mep33                                        |   |   |
| E7  | V3-P18-94 | SPCC1442.07c  | ubiquitin/metalloprotease fusion protein                         |   |   |
| E8  | V3-P19-39 | SPAC18G6.04c  | serine hydroxymethyltransferase Shm2 (predicted)                 |   |   |
| E9  | V3-P19-50 | SPAC24C9.12c  | glycine hydroxymethyltransferase (predicted)                     | • |   |
| E10 | V3-P19-56 | SPAC30C2.07   | sequence orphan                                                  |   |   |
| E11 | V3-P19-82 | SPBC14F5.11c  | sorting nexin Snx41 (predicted)                                  |   |   |
| E12 | V3-P20-37 | SPCC70.10     | sequence orphan                                                  |   |   |
| E13 | V3-P20-41 | SPAC1002.12c  | succinate-semialdehyde dehydrogenase (predicted)                 |   |   |
| E14 | V3-P20-59 | SPAC21E11.03c | transcription factor Pcr1                                        |   |   |
| E15 | V3-P20-82 | SPAPYUG7.04c  | DNA-directed RNA polymerase II complex subunit Rpb9              |   |   |
| E16 | V3-P21-16 | SPBC83.09c    | GYF domain protein                                               |   |   |
| F1  | V3-P21-34 | SPCC569.02c   | S. pombe specific UPF0321 family protein 2                       |   |   |
| F2  | V3-P21-50 | SPAC1F7.10    | hydantoin racemase family (predicted)                            |   |   |
| F3  | V3-P21-57 | SPAC29B12.06c | RNA-binding protein, CCR4-NOT complex subunit Rcd1               | • | • |
| F4  | V3-P21-63 | SPAC589.10c   | ribosomal-ubiquitin fusion protein Ubi5 (predicted)              |   |   |
| F5  | V3-P21-64 | SPAC5H10.02c  | ThiJ domain protein                                              |   |   |
| F6  | V3-P21-90 | SPBC2G5.01    | DUF1682 family protein                                           |   |   |
| F7  | V3-P22-54 | SPBC215.03c   | COP9/signalosome complex subunit Csn1                            | • | • |
| F8  | V3-P23-38 | SPBC106.01    | dual specificity protein kinase Mph1                             |   |   |
| F9  | V3-P23-49 | SPBC36B7.06c  | sequence orphan                                                  |   |   |
| F10 | V3-P23-58 | SPCC613.11c   | cell surface glycoprotein (predicted), DUF1773 family protein 2  |   |   |
| F11 | V3-P23-75 | SPAPB8E5.10   | conserved fungal protein, with meiosis specific splicing         |   |   |
| F12 | V3-P23-80 | SPBC3B8.10c   | Nem1-Spo7 phosphatase complex catalytic subunit Nem1 (predicted) |   |   |
| F13 | V3-P24-07 | SPAC869.07c   | alpha-galactosidase, melibiase                                   |   |   |
| F14 | V3-P24-57 | SPAC1687.07   | conserved fungal protein                                         |   |   |
| F15 | V3-P24-62 | SPAP27G11.06c | AP-1 adaptor complex sigma subunit Aps1                          |   |   |
| F16 | V3-P24-80 | SPAC7D4.08    | sequence orphan                                                  |   |   |
| G1  | V3-P25-45 | SPAC15E1.07c  | meiotic cohesin complex associated protein Moa1                  |   |   |
| G2  | V3-P25-50 | SPAC2E1P5.02c | Rab GTPase binding protein upregulated in meiosis II (predicted) |   |   |
| G3  | V3-P25-57 | SPBC365.11    | GRIP domain protein                                              |   |   |
| G4  | V3-P25-58 | SPBC4B4.03    | RSC complex subunit Rsc1                                         |   |   |

|     |           |               |                                                                                           |   |   |
|-----|-----------|---------------|-------------------------------------------------------------------------------------------|---|---|
| G5  | V3-P25-74 | SPBC21C3.19   | SBDS family protein Rtc3 (predicted)                                                      |   |   |
| G6  | V3-P25-91 | SPBPJ4664.05  | conserved fungal protein                                                                  |   |   |
| G7  | V3-P25-93 | SPCPJ732.01   | retromer complex subunit Vps5                                                             |   |   |
| G8  | V3-P25-94 | SPAC1142.01   | DUF654 family protein                                                                     |   |   |
| G9  | V3-P25-95 | SPAC15A10.15  | shugoshin Sgo2                                                                            |   |   |
| G10 | V3-P26-29 | SPAC29A4.05   | myosin I light chain Cam2                                                                 |   |   |
| G11 | V3-P26-47 | SPBC428.07    | meiotic chromosome segregation protein Meu6                                               | • | • |
| G12 | V3-P26-71 | SPCC594.07c   | bouquet formation protein Bqt3                                                            | • |   |
| G13 | V3-P26-77 | SPAC2E1P3.01  | dehydrogenase (predicted)                                                                 |   |   |
| G14 | V3-P26-91 | SPBC16A3.12c  | triglyceride lipase-cholesterol esterase (predicted)                                      |   |   |
| G15 | V3-P26-94 | SPBC609.05    | FACT complex component Pob3                                                               | • | • |
| G16 | V3-P27-16 | SPBP8B7.21    | ubiquitin C-terminal hydrolase Ubp3                                                       |   |   |
| H1  | V3-P27-23 | SPAC26A3.02   | adenine DNA glycosylase Myh1                                                              |   |   |
| H2  | V3-P27-24 | SPAC2G11.06   | AAA family ATPase Vps4 (predicted)                                                        |   |   |
| H3  | V3-P27-26 | SPAC6C3.03c   | sequence orphan                                                                           |   |   |
| H4  | V3-P27-29 | SPAC926.02    | conserved fungal protein                                                                  |   |   |
| H5  | V3-P27-31 | SPBC21B10.06c | myosin binding vezatin family protein involved in peroxisome inheritance Inp2 (predicted) |   |   |
| H6  | V3-P27-38 | SPAC11H11.01  | ESCRT I complex subunit Vps23                                                             |   |   |
| H7  | V3-P27-53 | SPBC6B1.09c   | Mre11 complex subunit Nbs1                                                                |   |   |
| H8  | V3-P27-56 | SPAC31F12.01  | zds family protein phosphatase type A regulator Zds1 (predicted)                          |   |   |
| H9  | V3-P27-64 | SPAC140.03    | argonaute binding protein 1                                                               |   |   |
| H10 | V3-P27-69 | SPBC83.11     | ER triose phosphate transmembrane transporter (predicted)                                 |   |   |
| H11 | V3-P27-95 | SPBC1289.11   | splicing factor Spf38                                                                     |   |   |
| H12 | V3-P28-23 | SPCC794.02    | wtf element Wtf5                                                                          |   |   |
| H13 | V3-P28-34 | SPAC29E6.07   | sequence orphan                                                                           |   |   |
| H14 | V3-P28-69 | SPAC1687.21   | phosphoglycerate mutase family (predicted)                                                |   |   |
| H15 | V3-P28-70 | SPAC6F6.17    | telomere length regulator protein Rif1                                                    | • | • |
| H16 | V3-P28-71 | SPBC800.02    | cell cycle transcriptional repressor Whi5 (predicted)                                     |   |   |
| I1  | V3-P28-91 | SPBC365.20c   | nicotinamidase (predicted)                                                                |   |   |
| I2  | V3-P29-18 | SPBC13G1.12   | vacuolar sorting protein Did2 (predicted)                                                 | • |   |
| I3  | V3-P29-20 | SPBC17D11.02c | ubiquitin-protein ligase Hrd1, synviolin family                                           |   |   |
| I4  | V3-P29-23 | SPBC1A4.03c   | DNA topoisomerase II                                                                      |   |   |
| I5  | V3-P29-39 | SPAC4G9.19    | DNAJ domain protein DNAJB family (predicted)                                              |   |   |
| I6  | V3-P29-55 | SPCC1223.15c  | DASH complex subunit Spc19                                                                | • |   |
| I7  | V3-P29-74 | SPAC16A10.01  | DUF1212 family protein                                                                    |   |   |

|     |           |               |                                                                               |   |   |
|-----|-----------|---------------|-------------------------------------------------------------------------------|---|---|
| I8  | V3-P29-75 | SPAC16C9.05   | Clr6 histone deacetylase associated PHD protein-1 Cph1                        | • | • |
| I9  | V3-P29-80 | SPAC1952.16   | RhoGAP, GTPase activator towards Rho/Rac/Cdc42-like small GTPases (predicted) |   |   |
| I10 | V3-P29-89 | SPAC19D5.03   | poly(A) polymerase Cid1                                                       |   |   |
| I11 | V3-P30-11 | SPAC25A8.01c  | fun thirty related protein Fft3                                               | • | • |
| I12 | V3-P30-31 | SPAC607.06c   | metallopeptidase                                                              |   |   |
| I13 | V3-P30-41 | SPAPB24D3.09c | ABC transporter Pdr1                                                          |   |   |
| I14 | V3-P30-46 | SPBC1347.02   | FKBP-type peptidyl-prolyl cis-trans isomerase (predicted)                     | • | • |
| I15 | V3-P30-81 | SPBC3B8.06    | conserved fungal protein                                                      |   |   |
| I16 | V3-P30-86 | SPBC530.01    | GTPase activating protein Gyp1 (predicted)                                    |   |   |
| J1  | V3-P30-89 | SPBC557.04    | Ark1/Prk1 family protein kinase Ppk29                                         |   |   |
| J2  | V3-P31-01 | SPBC725.06c   | serine/threonine protein kinase Ppk31 (predicted)                             |   |   |
| J3  | V3-P31-18 | SPCC1322.14c  | vacuolar transporter chaperone (VTC) complex subunit (predicted)              |   |   |
| J4  | V3-P31-22 | SPCC162.10    | serine/threonine protein kinase Ppk33 (predicted)                             |   |   |
| J5  | V3-P31-44 | SPCC965.06    | potassium channel subunit (predicted)                                         |   |   |
| J6  | V3-P31-47 | SPCC970.07c   | Rik1-associated factor Raf2                                                   | • | • |
| J7  | V3-P31-64 | SPAC24H6.03   | cullin 3                                                                      |   |   |
| J8  | V3-P31-66 | SPAC323.07c   | MatE family transporter (predicted)                                           |   |   |
| J9  | V3-P31-75 | SPBC25D12.05  | N2,N2-dimethylguanosine tRNA methyltransferase                                |   |   |
| J10 | V3-P31-78 | SPBC359.03c   | amino acid transporter Aat1 (predicted)                                       |   |   |
| J11 | V3-P31-83 | SPCC1322.12c  | serine/threonine protein kinase Bub1                                          |   |   |
| J12 | V3-P31-89 | SPCC285.16c   | MutS protein homolog                                                          | • |   |
| J13 | V3-P31-92 | SPCC584.11c   | Svf1 family protein Svf1                                                      |   |   |
| J14 | V3-P32-21 | SPAC977.16c   | dihydroxyacetone kinase Dak2                                                  |   |   |
| J15 | V3-P32-46 | SPCC4B3.03c   | mitochondrial morphology protein (predicted)                                  |   |   |
| J16 | V3-P32-63 | SPAC3G6.06c   | FEN-1 endonuclease Rad2                                                       |   |   |
| K1  | V3-P32-77 | SPBC428.17c   | Wings apart-like homolog Wpl1                                                 | • | • |
| K2  | V3-P32-78 | SPBC4F6.16c   | ER oxidoreductin Ero1a                                                        |   |   |
| K3  | V3-P33-11 | SPAC2E1P3.02c | ammonium transporter Amt3                                                     |   |   |
| K4  | V3-P33-12 | SPAC30D11.07  | DNA endonuclease III                                                          |   |   |
| K5  | V3-P33-28 | SPBC646.02    | complexed with Cdc5 protein Cwf11                                             |   |   |
| K6  | V3-P33-45 | SPAC1F8.03c   | siderophore-iron transporter Str3                                             |   |   |
| K7  | V3-P33-49 | SPAC23C11.06c | hydrolase (inferred from context)                                             |   |   |
| K8  | V3-P33-53 | SPAC869.06c   | HHE domain cation binding protein                                             |   |   |
| K9  | V3-P33-61 | SPBC16G5.15c  | fork head transcription factor Fkh2                                           | • | • |
| K10 | V3-P33-72 | SPCC16A11.03c | DUF2009 protein                                                               |   |   |

|                                                                  |                    |               |                                                                    |   |   |
|------------------------------------------------------------------|--------------------|---------------|--------------------------------------------------------------------|---|---|
| K11                                                              | V3-P33-82          | SPCC794.09c   | translation elongation factor EF-1 alpha Ef1a-a                    |   |   |
| K12                                                              | V3-P33-84          | SPCPB16A4.02c | conserved fungal protein                                           |   |   |
| K13                                                              | V3-P34-37          | SPAC4F10.14c  | Basic transcription factor Btf3                                    | • | • |
| K14                                                              | V3-P34-51          | SPAC4G9.12    | gluconokinase                                                      |   |   |
| K15                                                              | V3-P34-60          | SPBC3H7.05c   | sequence orphan                                                    |   |   |
| K16                                                              | V3-P34-61          | SPBC3H7.14    | BRCT domain protein                                                |   |   |
| L1                                                               | V3-P34-86          | SPBC3E7.02c   | heat shock protein Hsp16                                           |   |   |
| L2                                                               | V3-P34-90          | SPCC417.02    | DASH complex subunit Dad5                                          |   |   |
| L3                                                               | V3-P35-03          | SPAC3H1.08c   | DUF1640 family protein                                             |   |   |
| L4                                                               | V3-P35-05          | SPBC1539.07c  | glutathione-dependent formaldehyde dehydrogenase (predicted)       |   |   |
| L5                                                               | V3-P35-25          | SPAC27D7.04   | 4-alpha-hydroxytetrahydrobiopterin dehydratase (predicted)         |   |   |
| L6                                                               | V3-P35-44          | SPCC1020.13c  | DDHD family phospholipase (predicted)                              |   |   |
| L7                                                               | V3-P35-48          | SPAC13G6.13   | sequence orphan                                                    |   |   |
| L8                                                               | V3-P35-62          | SPBC16G5.09   | serine carboxypeptidase (predicted)                                |   |   |
| L9                                                               | V3-P35-81          | SPAC12G12.11c | DUF544 family protein                                              |   |   |
| L10                                                              | V3-P35-84          | SPCC4B3.05c   | uroporphyrinogen decarboxylase Hem12 (predicted)                   |   |   |
| L11                                                              | V3-P36-01          | SPCC613.08    | CDK regulator, involved in ribosome export (predicted)             |   |   |
| L12                                                              | V3-P36-27          | SPBC1198.09   | ubiquitin conjugating enzyme Ubc16 (predicted)                     |   |   |
| L13                                                              | V3-P36-35          | SPAC3H1.07    | arginase Aru1                                                      |   |   |
| L14                                                              | V3-P36-44          | SPBC3E7.06c   | vacuolar membrane amino acid uptake transporter Fnx2               |   |   |
| L15                                                              | V3-P36-54          | SPCC364.01    | calnexin independence factor Cif1                                  |   |   |
| Deletion strains independently re-tested and added to final list |                    |               |                                                                    |   |   |
| -                                                                | V3-P11-59          | SPBC354.10    | RNAPII degradation factor Def1 (predicted)                         | • | • |
| -                                                                | V3-P19-76          | SPAPB1E7.02c  | DNA polymerase alpha accessory factor Mcl1                         | • | • |
| -                                                                | V3-P20-56          | SPAC1952.05   | SAGA complex histone acetyltransferase catalytic subunit Gcn5      | • | • |
| -                                                                | V3-P30-44          | SPBC1198.11c  | RNA polymerase I transcription termination factor Reb1             | • | • |
| -                                                                | V3-P03-26          | SPAC1071.02   | Dos2 silencing complex subunit Mms19                               | • | • |
| -                                                                | added <sup>b</sup> | SPBC216.06c   | replication fork protection complex subunit Swi1                   | • | • |
| -                                                                | added <sup>b</sup> | SPBC30D10.04  | replication fork protection complex subunit Swi3                   | • | • |
| -                                                                | added <sup>b</sup> | SPCC613.12c   | CLRC ubiquitin E3 ligase complex specificity factor Clr8/Raf1/Dos1 | • | • |

<sup>a</sup> Abo2 was examined for comparison with Abo1.

<sup>b</sup> These strains were not in the V3 Bioneer library.

**Table S2.** Potential false positives. The strains listed in this Table produced Ade<sup>+</sup> colonies in the absence of crossing indicating the Ade<sup>+</sup> phenotype following crosses is not likely to reflect (*EcoRV*)::*ade6*<sup>+</sup> expression.

|           |               |                                             |
|-----------|---------------|---------------------------------------------|
| V3-P02-69 | SPBC3D6.09    | DNA polymerase epsilon subunit Dpb4         |
| V3-P11-45 | SPBC23E6.09   | transcriptional co-repressor Ssn6           |
| V3-P15-60 | SPBC25D12.02c | nucleolar protein Dnt1                      |
| V3-P17-26 | SPBC1A4.09    | pseudouridine synthase (predicted)          |
| V3-P17-46 | SPBC577.05c   | meiotic recombination protein Rec27         |
| V3-P17-49 | SPBC776.06c   | Arf3/6 docking factor (predicted)           |
| V3-P19-93 | SPBC216.03    | conserved fungal protein                    |
| V3-P19-94 | SPBC21C3.12c  | DUF953 family protein                       |
| V3-P20-13 | SPBC56F2.01   | F-box protein Pof12                         |
| V3-P21-03 | SPBC21.03c    | DUF55 family protein                        |
| V3-P21-93 | SPBC582.06c   | horsetail movement protein Hrs1/Mcp6        |
| V3-P23-51 | SPBC887.06c   | sorting nexin Snx3 (predicted)              |
| V3-P28-66 | SPBC16E9.18   | phosphatidylserine decarboxylase Psd1       |
| V3-P28-92 | SPBC13G1.14c  | RNA-binding protein (predicted)             |
| V3-P29-55 | SPCC1223.15c  | DASH complex subunit Spc19                  |
| V3-P34-57 | SPBC21C3.07c  | actin binding methyltransferase (predicted) |
| V3-P35-71 | SPBC21.02     | TLDc domain protein 2                       |



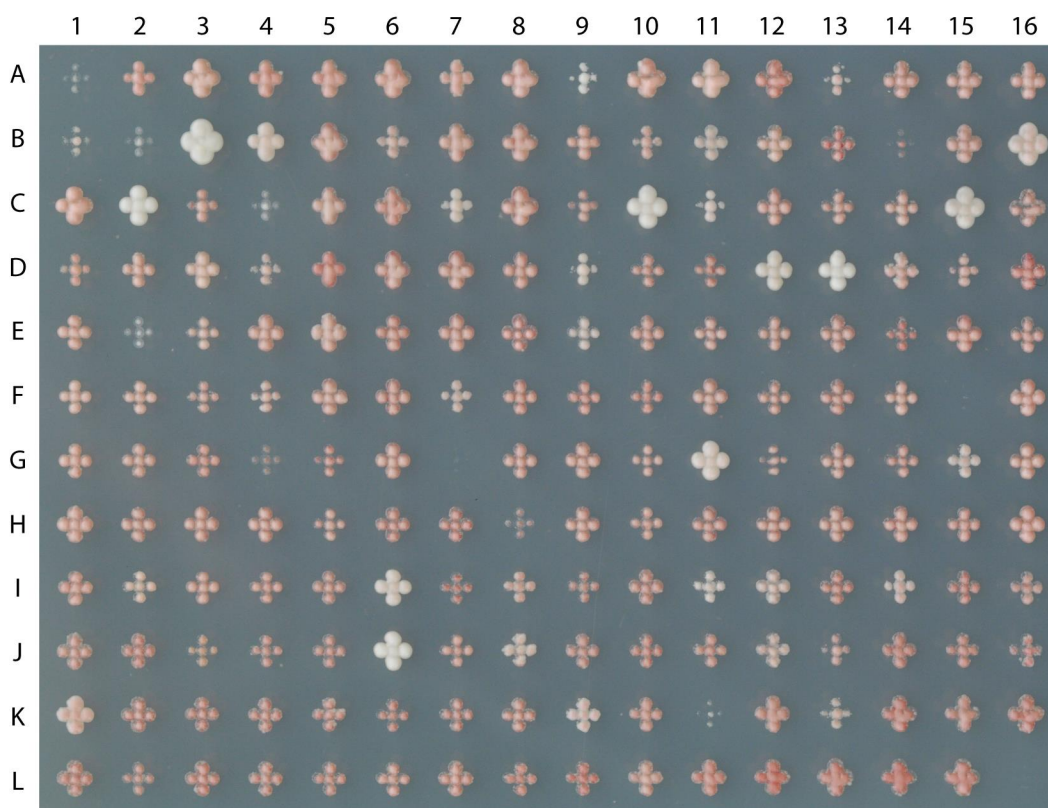

crosses with strain B19 (*IR-R*<sup>+</sup>)

**Figure S1.** Second screen with *IR-R*<sup>+</sup> boundary. Strain B19 was crossed with strains from the Bioneer collection as described. *(EcoRV)::ade6*<sup>+</sup> expression was assayed in progeny combining *(EcoRV)::ade6*<sup>+</sup>*IR-R*<sup>+</sup> with each ORF deletion listed in Table S1. In the image shown, the recombinant progeny was propagated on NBA medium supplemented with leucine to assess *(EcoRV)::ade6*<sup>+</sup> expression.

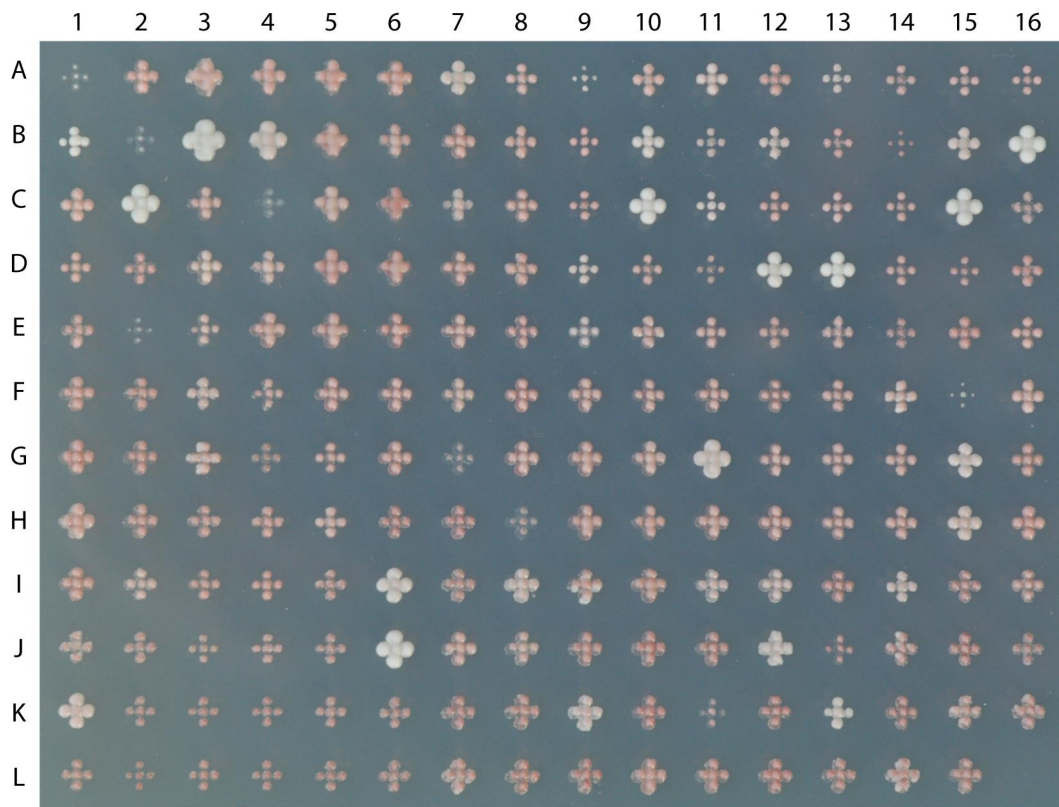

crosses with strain B15 (*STAR1*)

**Figure S2.** Second screen with *STAR1* boundary. Same as Figure S1, with strain B15 in which *IR-R<sup>+</sup>* is replaced with the *STAR1* element.

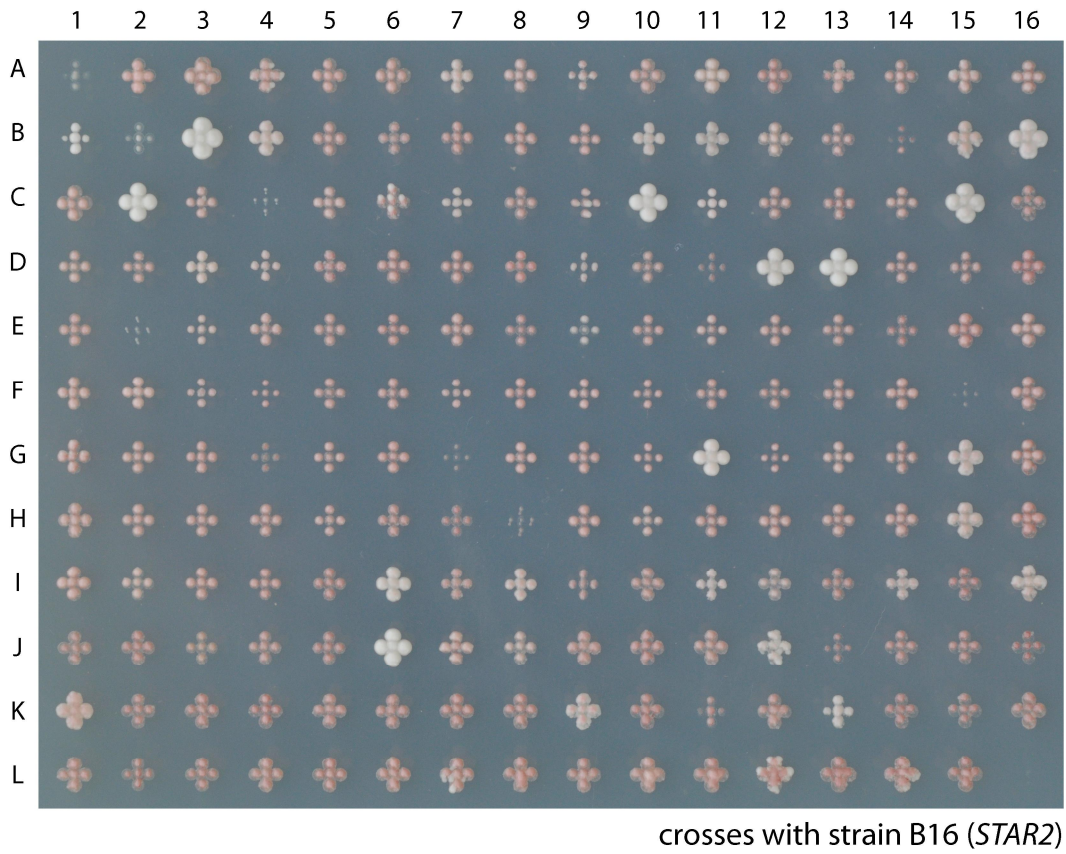

**Figure S3.** Second screen with *STAR2* boundary. Same as Figure S1, with strain B16 in which *IR-R<sup>+</sup>* is replaced with the *STAR2* element.

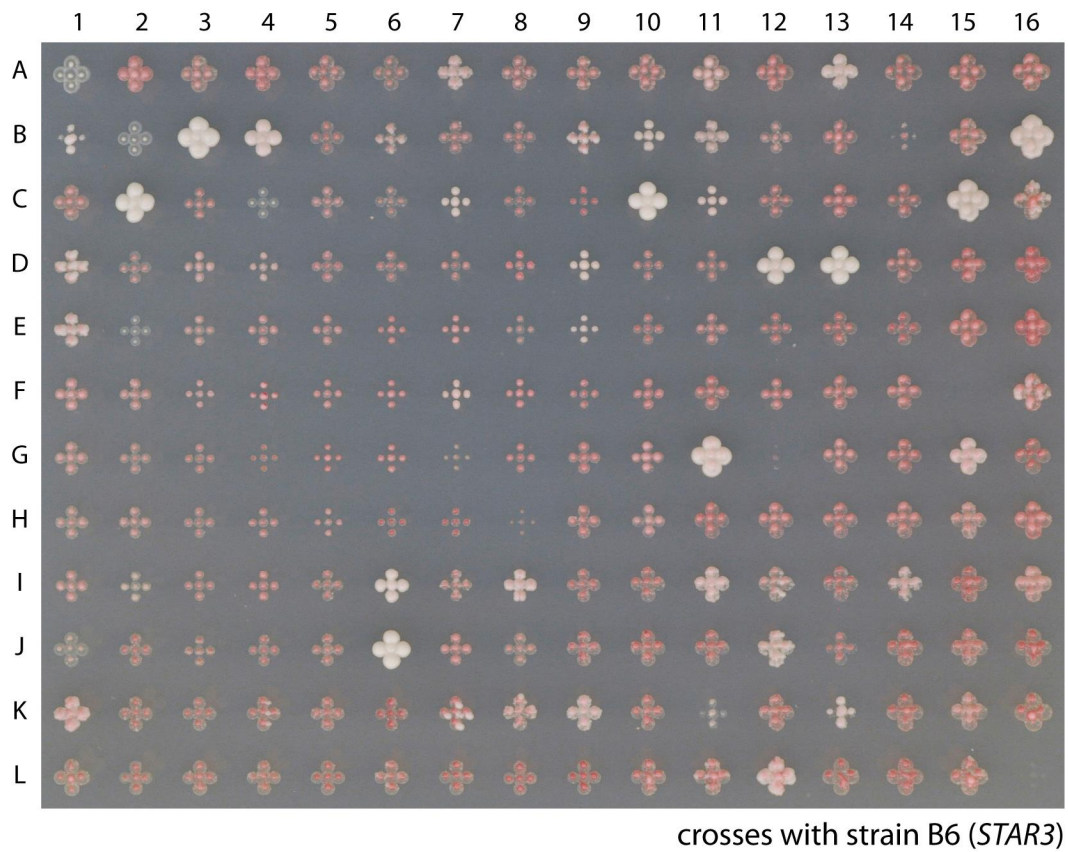

**Figure S4.** Second screen with *STAR3* boundary. Same as Figure S1, with strain B6 in which *IR-R<sup>+</sup>* is replaced with the *STAR3* element.

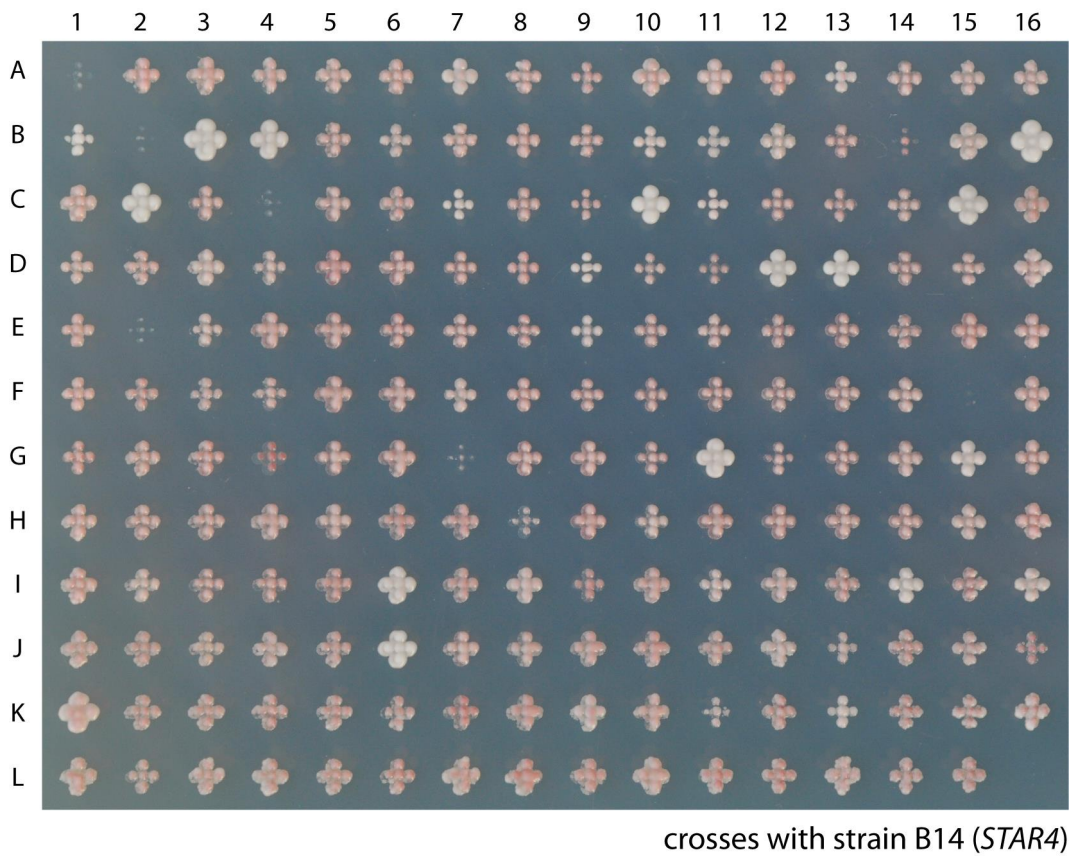

**Figure S5.** Second screen with *STAR4* boundary. Same as Figure S1, with strain B14 in which *IR-R<sup>+</sup>* is replaced with the *STAR4* element.

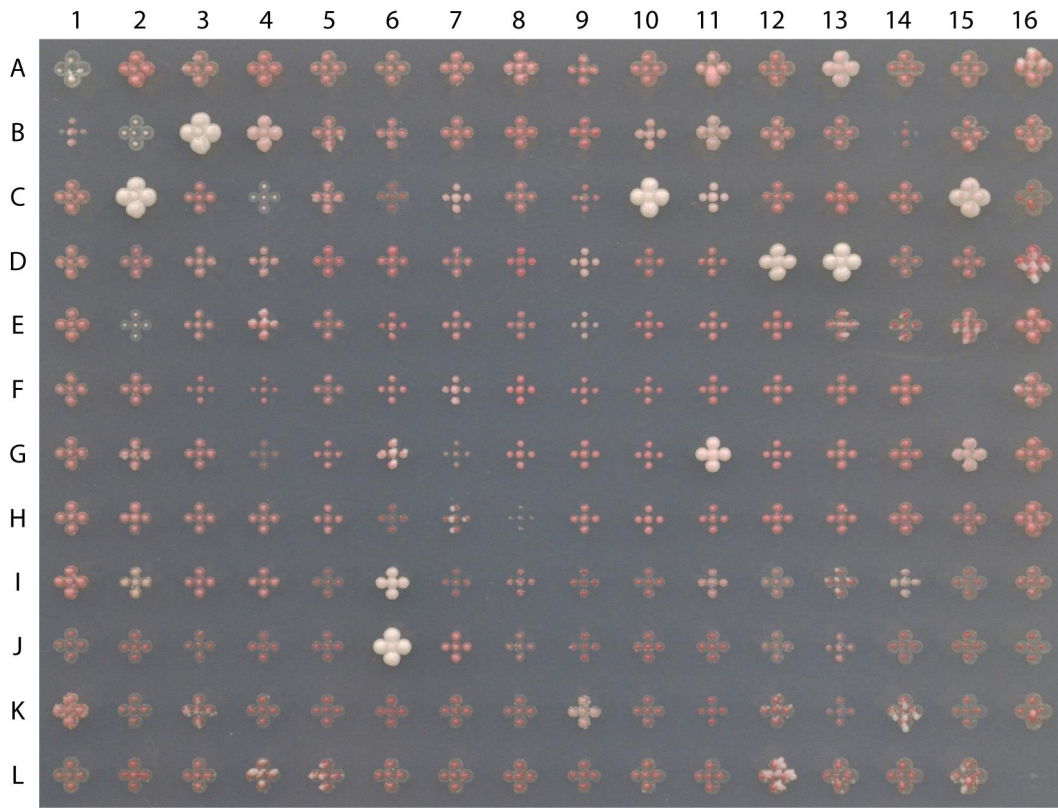

crosses with strain B7 (*BTH1*)

**Figure S6.** Second screen with *BTH1* boundary. Same as Figure S1, with strain B7 in which *IR-R<sup>+</sup>* is replaced with the *BTH1* element.

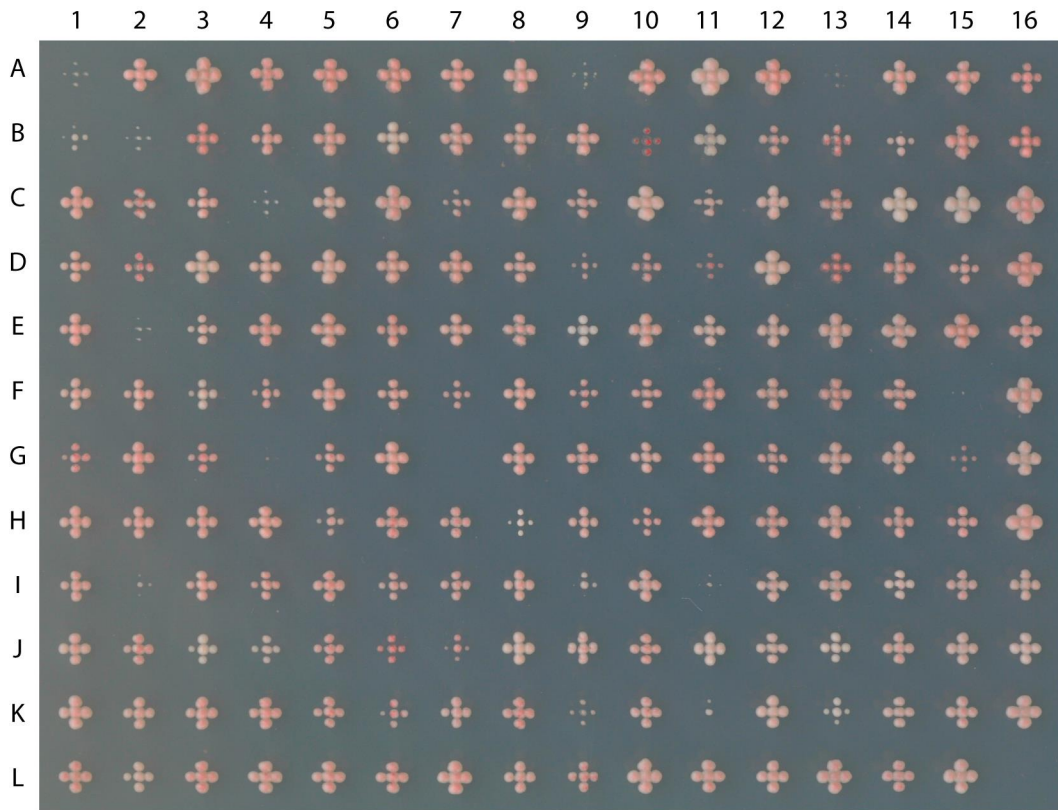

crosses with strain B17 (*rDNA*)

**Figure S7.** Second screen with *rDNA* boundary. Same as Figure S1, with strain B17 in which *IR-R<sup>+</sup>* is replaced with an *rDNA* repeat.

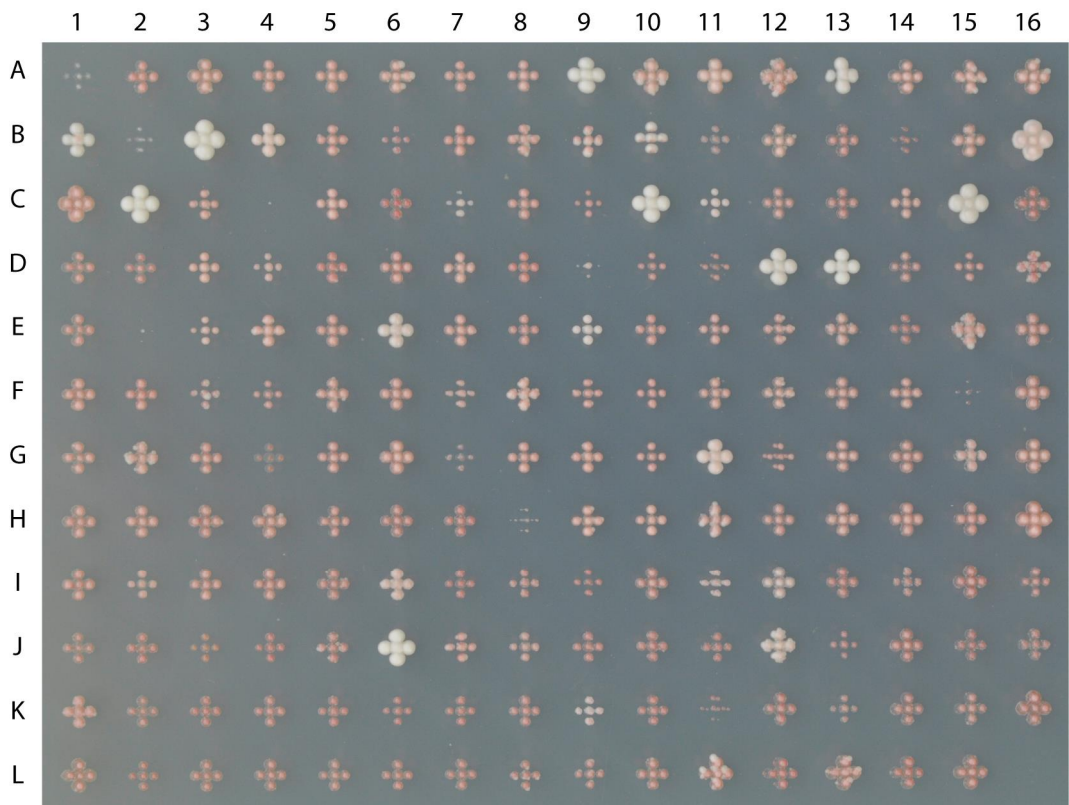

crosses with strain B18 (*cen1*)

**Figure S8.** Second screen with *cen1* boundary. Same as Figure S1, with strain B18 in which *IR-R*<sup>+</sup> is replaced with the *cen1* element.



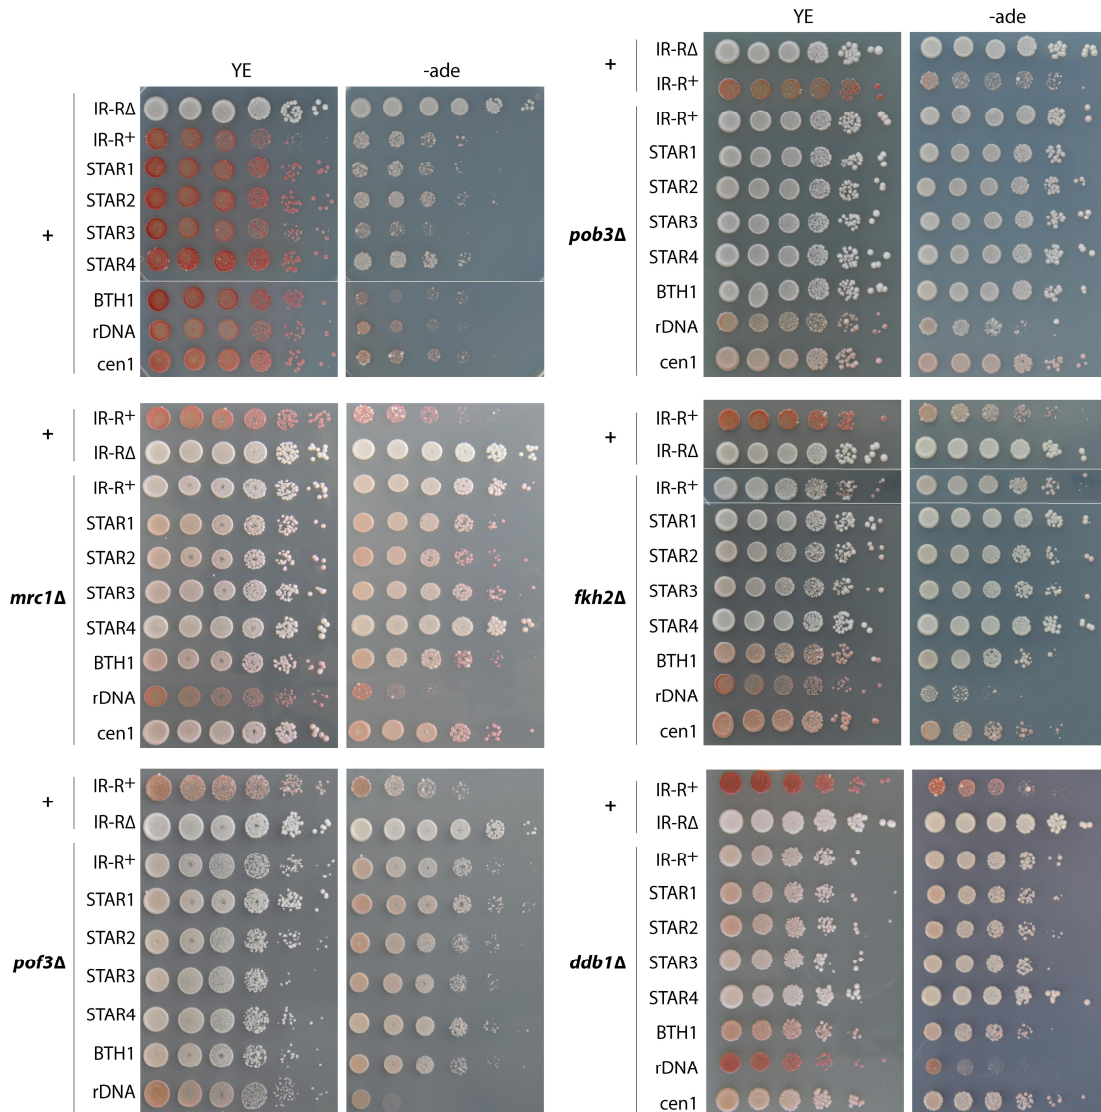

**Figure S9.** Third screen: effect of Pob3, Mrc1, Fkh2, Pof3, and Ddb1 on heterochromatic silencing at *(EcoRV)::ade6<sup>+</sup>*. Ten-fold serial dilutions of cell suspensions were spotted on medium with a low adenine concentration (YE) or no adenine. The wild-type series (+) shows PG3947 (IR-R<sup>-</sup>) together with the query strains used in the screen: B19, B15, B16, B6, B14, B7, B17, and B18. In the following panels, PG3950 (IR-R<sup>+</sup>) and PG3947 (IR-R<sup>-</sup>) were spotted on all plates as standards for *(EcoRV)::ade6<sup>+</sup>* repression and derepression respectively. Strains used for *pob3Δ* series: DN173, DN169, DN170, DN166, DN168, DN167, DN171, DN172; strains used for *mrc1Δ* series: LJ102, LJ117, LJ118, LJ114, LJ116, LJ115, LJ119, LJ120; strains used for *fkh2Δ* series: DN129, DN125, DN126, DN122, DN124, DN123, DN127; strains used for *pob3Δ* series: LJ220, LJ224, LJ225, LJ221, LJ223, LJ222, LJ226; strains used for *ddb1Δ* series: DN105, DN101, DN102, DN98, DN100, DN101, DN103.

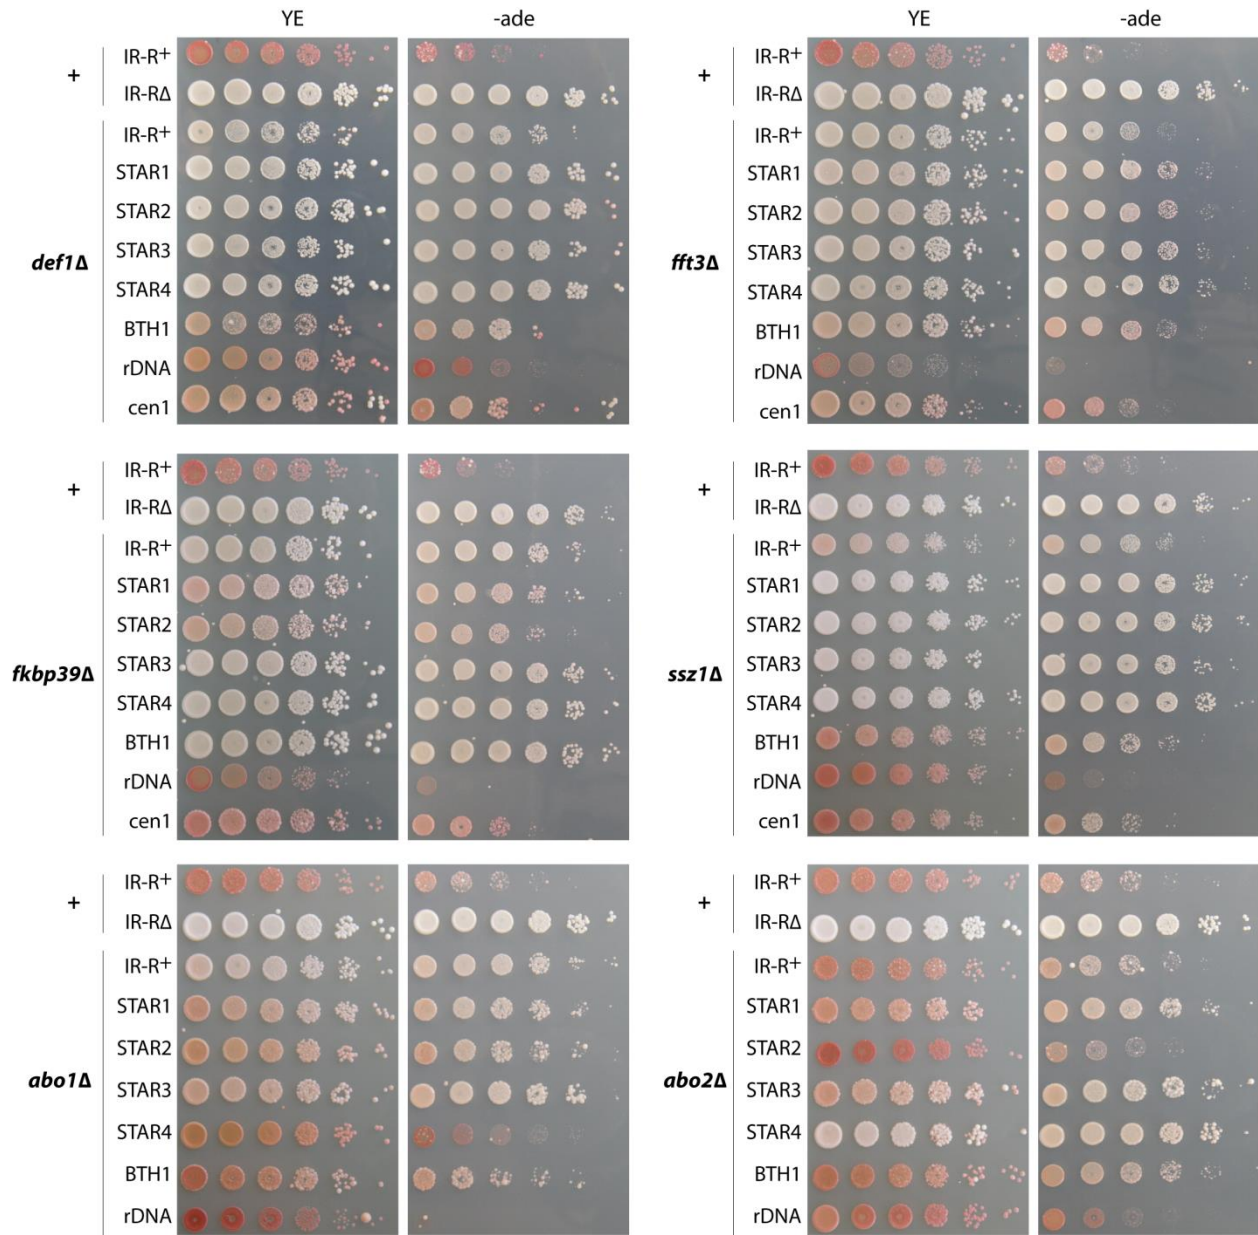

**Figure S10.** Third screen: effect of Def1, Fft3, Fkbp39, Ssz1, Abo1 and Abo2 on heterochromatic silencing at *(EcoRV)::ade6<sup>+</sup>*. As in Figure S9, PG3950 (IR-R<sup>+</sup>) and PG3947 (IR-R<sup>-</sup>) were spotted on all plates as standards for *(EcoRV)::ade6<sup>+</sup>* repression and derepression respectively. Strains used for *def1Δ* series: LJ100, LJ152, LJ153, LJ149, LJ151, LJ150, LJ154, LJ155; strains used for *fft3Δ* series: LJ103, LJ124, LJ125, LJ121, LJ123, LJ122, LJ126, LJ127; strains used for *fkbp39Δ* series: LJ104, LJ131, LJ132, LJ128, LJ130, LJ129, LJ133, LJ134; strains used for *ssz1Δ* series: LJ203, LJ202, LJ111, LJ107, LJ109, LJ108, LJ112, LJ113; strains used for *abo1* series: LJ199, DB44, DB45, DB41, DB43, DB42, DB46; strains used for *abo2Δ* series: LJ105, DB52, DB53, DB49, DB51, DB50, DB54. See Figure S9 for control strains with ectopic boundary elements in wild-type background.

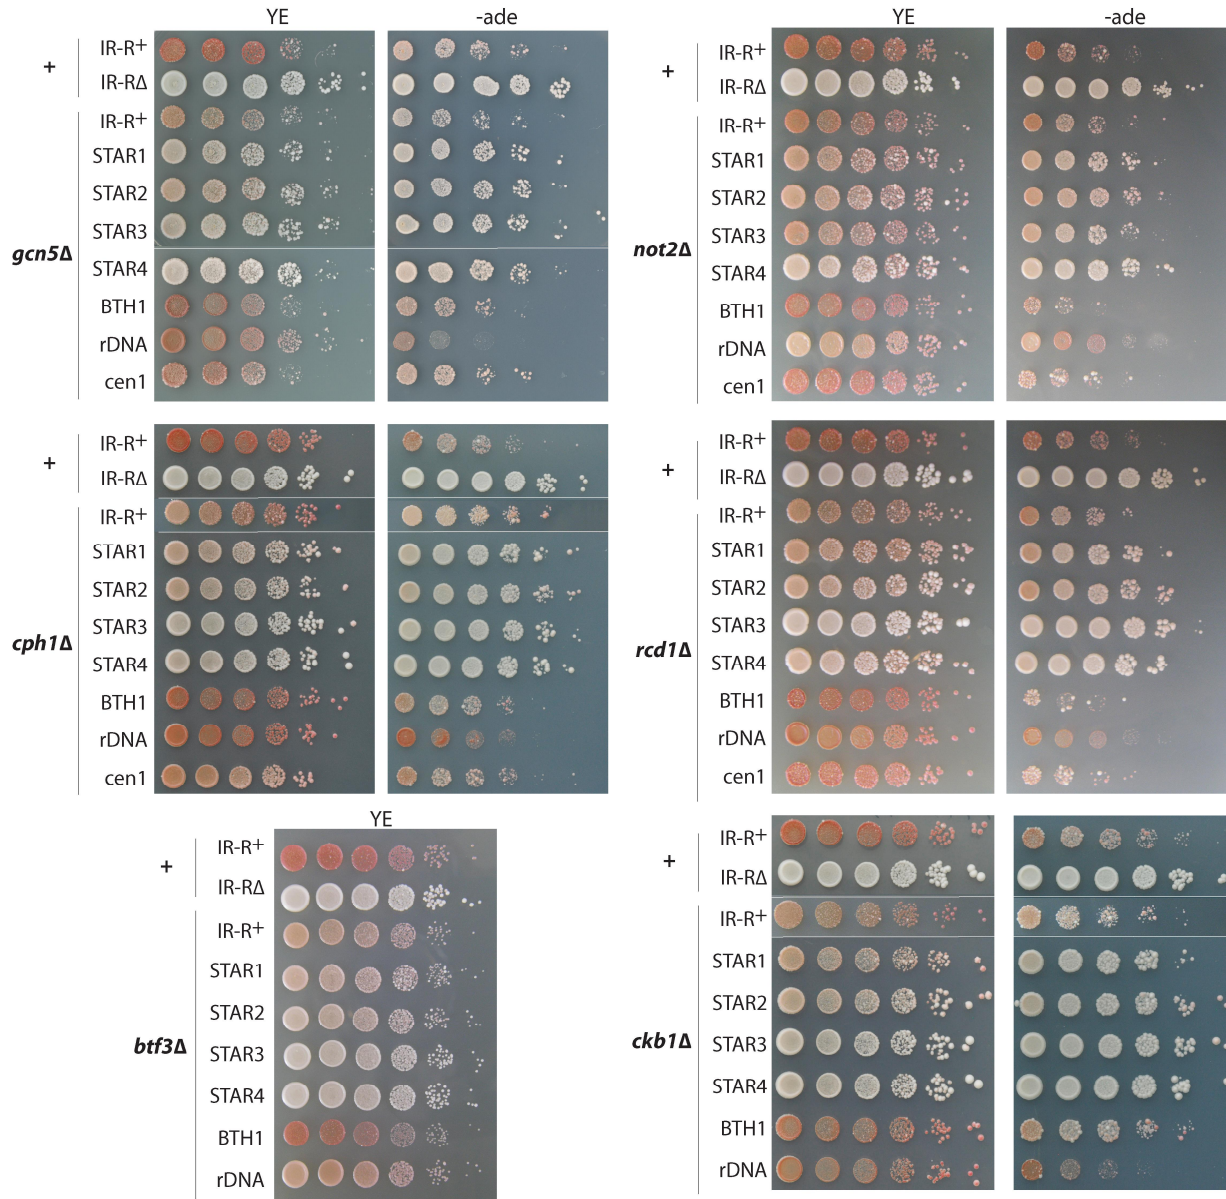

**Figure S11.** Third screen: effect of Gcn5, Not2, Cph1, Rcd1, Btf3, and Ckb1 on heterochromatic silencing at *(EcoRV)::ade6<sup>+</sup>*. As in Figure S9, PG3950 (*IR-R<sup>+</sup>*) and PG3947 (*IR-R<sup>-</sup>*) were spotted on all plates as standards for *(EcoRV)::ade6<sup>+</sup>* repression and derepression respectively. Strains used for *gcn5Δ* series: PA91-PA98; strains used for *not2Δ* series: DB105, DB4, DB5, DB1, DB3, DB2, DB6, DB7; strains used for *cph1Δ* series: DN121, DN117, DN118, DN114, DN116, DN115, DN119, DN120; strains used for *rcd1Δ* series: DB112, DB60, DB61, DB57, DB59, DB58, DB62, DB63; strains used for *btf3Δ* series: DB16, DB20, DB21, DB17, DB19, DB18, DB22, DB23; strains used for *ckb1Δ* series: DN97, DN93, DN94, DN90, DN92, DN91, DN95. See Figure S9 for control strains with ectopic boundary elements in wild-type background.

**Table S3.** Strains and their genotypes.

| Strain                                                            | Genotype                                                                                                                                                     |
|-------------------------------------------------------------------|--------------------------------------------------------------------------------------------------------------------------------------------------------------|
| <b>Strains used for strain constructions and plating controls</b> |                                                                                                                                                              |
| PG3947                                                            | <i>mat3-M (EcoRV)::ade6<sup>+</sup> IR-Δ (BplI)::LEU2 leu1-32 ura4-D18 ade6-DN/N</i>                                                                         |
| PG3950                                                            | <i>mat3-M (EcoRV)::ade6<sup>+</sup> (BplI)::LEU2 leu1-32 ura4-D18 ade6-DN/N</i>                                                                              |
| PC152                                                             | <i>mat3-M (EcoRV)::ade6<sup>+</sup> IR-Δ (SpeI)::(STAR2) (BplI)::LEU2 leu1-32 ura4-D18 ade6-DN/N</i>                                                         |
| PT600                                                             | <i>mat3-M (EcoRV)::ade6<sup>+</sup> IR-Δ (SpeI)::(STAR2-S) (BplI)::LEU2 leu1-32 ura4-D18 ade6-DN/N</i>                                                       |
| <b>Query strains used in library screens</b>                      |                                                                                                                                                              |
| B6                                                                | <i>(Xmnl)::ura4<sup>+</sup> mat2-P mat3-M (EcoRV)::ade6<sup>+</sup> IR-Δ (SpeI)::(BTH1) (BplI)::LEU2 leu1-32 ura4-D18 ade6-DN/N arg12Δ::natR</i>             |
| B7                                                                | <i>(Xmnl)::ura4<sup>+</sup> mat2-P mat3-M (EcoRV)::ade6<sup>+</sup> IR-Δ (SpeI)::(STAR3) (BplI)::LEU2 leu1-32 ura4-D18 ade6-DN/N arg12Δ::natR</i>            |
| B14                                                               | <i>(Xmnl)::ura4<sup>+</sup> mat2-P mat3-M (EcoRV)::ade6<sup>+</sup> IR-Δ (SpeI)::(STAR4) (BplI)::LEU2 leu1-32 ura4-D18 ade6-DN/N arg12Δ::natR</i>            |
| B15                                                               | <i>(Xmnl)::ura4<sup>+</sup> mat2-P mat3-M (EcoRV)::ade6<sup>+</sup> IR-Δ (SpeI)::(STAR1) (BplI)::LEU2 leu1-32 ura4-D18 ade6-DN/N arg12Δ::natR</i>            |
| B16                                                               | <i>(Xmnl)::ura4<sup>+</sup> mat2-P mat3-M (EcoRV)::ade6<sup>+</sup> IR-Δ (SpeI)::(STAR2) (BplI)::LEU2 leu1-32 ura4-D18 ade6-DN/N arg12Δ::natR</i>            |
| B17                                                               | <i>(Xmnl)::ura4<sup>+</sup> mat2-P mat3-M (EcoRV)::ade6<sup>+</sup> R-Δ (SpeI)::(rDNA) (BplI)::LEU2 leu1-32 ura4-D18 ade6-DN/N arg12Δ::natR</i>              |
| B18                                                               | <i>(Xmnl)::ura4<sup>+</sup> mat2-P mat3-M (EcoRV)::ade6<sup>+</sup> IR-Δ (SpeI)::(cen1) (BplI)::LEU2 leu1-32 ura4-D18 ade6-DN/N arg12Δ::natR</i>             |
| B19                                                               | <i>(Xmnl)::ura4<sup>+</sup> mat2-P mat3-M (EcoRV)::ade6<sup>+</sup> leu1-32 ura4-D18 ade6-DN/N arg12Δ::natR</i>                                              |
| <b>Strains in Figure 4</b>                                        |                                                                                                                                                              |
| LJ99                                                              | <i>mat3-M (EcoRV)::ade6<sup>+</sup> (BplI)::LEU2 clr4Δ::kanR leu1-32 ura4-D18 ade6-DN/N</i>                                                                  |
| PG3950                                                            | <i>mat3-M (EcoRV)::ade6<sup>+</sup> (BplI)::LEU2 leu1-32 ura4-D18 ade6-DN/N</i>                                                                              |
| LJ102                                                             | <i>mat3-M (EcoRV)::ade6<sup>+</sup> (BplI)::LEU2 mrc1Δ::kanR leu1-32 ura4-D18 ade6-DN/N</i>                                                                  |
| LJ100                                                             | <i>mat3-M (EcoRV)::ade6<sup>+</sup> (BplI)::LEU2 def1Δ::kanR leu1-32 ura4-D18 ade6-DN/N</i>                                                                  |
| LJ220                                                             | <i>mat3-M (EcoRV)::ade6<sup>+</sup> (BplI)::LEU2 pof3Δ::kanR leu1-32 ura4-D18 ade6-DN/N</i>                                                                  |
| LJ203                                                             | <i>mat3-M (EcoRV)::ade6<sup>+</sup> (BplI)::LEU2 ssz1Δ::kanR leu1-32 ura4-D18 ade6-DN/N</i>                                                                  |
| LJ104                                                             | <i>mat3-M (EcoRV)::ade6<sup>+</sup> (BplI)::LEU2 fkbp39Δ::kanR leu1-32 ura4-D18 ade6-DN/N</i>                                                                |
| LJ103                                                             | <i>mat3-M (EcoRV)::ade6<sup>+</sup> (BplI)::LEU2 fft3Δ::kanR leu1-32 ura4-D18 ade6-DN/N</i>                                                                  |
| LJ199                                                             | <i>mat3-M (EcoRV)::ade6<sup>+</sup> (BplI)::LEU2 abo1Δ::kanR leu1-32 ura4-D18 ade6-DN/N</i>                                                                  |
| LJ105                                                             | <i>mat3-M (EcoRV)::ade6<sup>+</sup> (BplI)::LEU2 abo2Δ::kanR leu1-32 ura4-D18 ade6-DN/N</i>                                                                  |
| PM20                                                              | <i>mat3-M(EcoRV)::ade6<sup>+</sup> swi1::kanR leu1<sup>+</sup> CO3-CFP ura4-D18 ade6-DN/N his7<sup>+</sup>::lacI-GFP his2[::hph1-ura4<sup>+</sup>-lacOp]</i> |
| PM24                                                              | <i>mat3-M(EcoRV)::ade6<sup>+</sup> swi3::kanR leu1<sup>+</sup> CO3-CFP ura4-D18 ade6-DN/N his7<sup>+</sup>::lacI-GFP his2[::hph1-ura4<sup>+</sup>-lacOp]</i> |
| <b>Strains in Figure 6</b>                                        |                                                                                                                                                              |
| LJ177                                                             | <i>mat3-M (EcoRV)::ura4<sup>+</sup> clr4Δ::kanR leu1-32 ura4-DS/E ade6-210</i>                                                                               |
| PG1899                                                            | <i>mat3-M (EcoRV)::ura4<sup>+</sup> leu1-32 ura4-DS/E ade6-216</i>                                                                                           |
| LJ176                                                             | <i>mat3-M (EcoRV)::ura4<sup>+</sup> mrc1Δ::kanR leu1-32 ura4-DS/E ade6-210</i>                                                                               |
| LJ178                                                             | <i>mat3-M (EcoRV)::ura4<sup>+</sup> pof3Δ::kanR leu1-32 ura4-DS/E ade6-210</i>                                                                               |
| LJ179                                                             | <i>mat3-M (EcoRV)::ura4<sup>+</sup> def1Δ::kanR leu1-32 ura4-DS/E ade6-210</i>                                                                               |

|                            |                                                                                                                     |
|----------------------------|---------------------------------------------------------------------------------------------------------------------|
| LJ175                      | <i>mat3-M (EcoRV)::ura4<sup>+</sup> ssz1Δ::kanR leu1-32 ura4-DS/E ade6-210</i>                                      |
| LJ196                      | <i>mat3-M (EcoRV)::ura4<sup>+</sup> fkbp39Δ::kanR leu1-32 ura4-DS/E ade6-210</i>                                    |
| LJ197                      | <i>mat3-M (EcoRV)::ura4<sup>+</sup> fft3Δ::kanR leu1-32 ura4-DS/E ade6-210</i>                                      |
| <b>Strains in Figure 7</b> |                                                                                                                     |
| PA71                       | <i>mat3-M (EcoRV)::ade6<sup>+</sup> (BplI)::LEU2 mcl1Δ::kanR leu1-32 ura4-D18 ade6-DN/N</i>                         |
| PA72                       | <i>mat3-M (EcoRV)::ade6<sup>+</sup> IR-RA (SpeI)::(STAR2) (BplI)::LEU2 mcl1Δ::kanR leu1-32 ura4-D18 ade6-DN/N</i>   |
| PA73                       | <i>mat3-M (EcoRV)::ade6<sup>+</sup> IR-RA (SpeI)::(STAR2-S) (BplI)::LEU2 mcl1Δ::kanR leu1-32 ura4-D18 ade6-DN/N</i> |
| PA74                       | <i>mat3-M (EcoRV)::ade6<sup>+</sup> IR-RA (BplI)::LEU2 mcl1Δ::kanR leu1-32 ura4-D18 ade6-DN/N</i>                   |
| PA82                       | <i>mat3-M (EcoRV)::ade6<sup>+</sup> (BplI)::LEU2 wpl1Δ::kanR leu1-32 ura4-D18 ade6-DN/N</i>                         |
| PA83                       | <i>mat3-M (EcoRV)::ade6<sup>+</sup> IR-RA (SpeI)::(STAR2) (BplI)::LEU2 wpl1Δ::kanR leu1-32 ura4-D18 ade6-DN/N</i>   |
| PA84                       | <i>mat3-M (EcoRV)::ade6<sup>+</sup> IR-RA (SpeI)::(STAR2-S) (BplI)::LEU2 wpl1Δ::kanR leu1-32 ura4-D18 ade6-DN/N</i> |
| PA85                       | <i>mat3-M (EcoRV)::ade6<sup>+</sup> IR-RA (BplI)::LEU2 l wpl1Δ::kanR leu1-32 ura4-D18 ade6-DN/N</i>                 |
| <b>Strains in Figure 8</b> |                                                                                                                     |
| LJ171                      | <i>h<sup>A</sup> clr4Δ::kanR leu1-32 ura4-DS/E ade6-210/216 Chr16 m23:ura4<sup>+</sup>-TEL(72)</i>                  |
| FY520                      | <i>h<sup>+</sup> leu1-32 ura4-DS/E ade6-210/216 Chr16 m23:ura4-TEL(72)</i>                                          |
| LJ163                      | <i>h<sup>A</sup> mrc1Δ::kanR leu1-32 ura4-DS/E ade6-210/216 Chr16 m23:ura4<sup>+</sup>-TEL(72)</i>                  |
| LJ172                      | <i>h<sup>A</sup> pof3Δ::kanR leu1-32 ura4-DS/E ade6-210/216 Chr16 m23:ura4<sup>+</sup>-TEL(72)</i>                  |
| LJ173                      | <i>h<sup>A</sup> def1Δ::kanR leu1-32 ura4-DS/E ade6-210/216 Chr16 m23:ura4<sup>+</sup>-TEL(72)</i>                  |
| LJ162                      | <i>h<sup>A</sup> ssz1Δ::kanR leu1-32 ura4-DS/E ade6-210/216 Chr16 m23:ura4<sup>+</sup>-TEL(72)</i>                  |
| LJ174                      | <i>h<sup>A</sup> fkbp39Δ::kanR leu1-32 ura4-DS/E ade6-210/216 Chr16 m23:ura4<sup>+</sup>-TEL(72)</i>                |
| LJ165                      | <i>h<sup>A</sup> fft3Δ::kanR leu1-32 ura4-DS/E ade6-210/216 Chr16 m23:ura4<sup>+</sup>-TEL(72)</i>                  |
| LJ170                      | <i>h<sup>A</sup> bt3Δ::kanR leu1-32 ura4-DS/E ade6-210/216 Chr16 m23:ura4<sup>+</sup>-TEL(72)</i>                   |
| LJ168                      | <i>h<sup>A</sup> rif1Δ::kanR leu1-32 ura4-DS/E ade6-210/216 Chr16 m23:ura4<sup>+</sup>-TEL(72)</i>                  |
| LJ161                      | <i>h<sup>A</sup> abo1Δ::kanR leu1-32 ura4-DS/E ade6-210/216 Chr16 m23:ura4<sup>+</sup>-TEL(72)</i>                  |
| LJ166                      | <i>h<sup>A</sup> abo2Δ::kanR leu1-32 ura4-DS/E ade6-210/216 Chr16 m23:ura4-TEL(72)</i>                              |
| LJ185                      | <i>h<sup>A</sup> clr4Δ::kanR leu1-32 ura4-DS/E ade6-210 otr1(SphI)::ura4<sup>+</sup></i>                            |
| FY648                      | <i>h<sup>+</sup> leu1-32 ura4-DS/E ade6-210 otr1(SphI)::ura4<sup>+</sup></i>                                        |
| LJ180                      | <i>h<sup>A</sup> mrc1Δ::kanR leu1-32 ura4-DS/E ade6-210 otr1(SphI)::ura4<sup>+</sup></i>                            |
| LJ186                      | <i>h<sup>A</sup> pof3Δ::kanR leu1-32 ura4-DS/E ade6-210 otr1(SphI)::ura4<sup>+</sup></i>                            |
| LJ190                      | <i>h<sup>A</sup> def1Δ::kanR leu1-32 ura4-DS/E ade6-210 otr1(SphI)::ura4<sup>+</sup></i>                            |
| LJ192                      | <i>h<sup>A</sup> ssz1Δ::kanR leu1-32 ura4-DS/E ade6-210 otr1(SphI)::ura4<sup>+</sup></i>                            |
| LJ187                      | <i>h<sup>A</sup> fkbp39Δ::kanR leu1-32 ura4-DS/E ade6-210 otr1(SphI)::ura4<sup>+</sup></i>                          |
| LJ183                      | <i>h<sup>A</sup> bt3Δ::kanR leu1-32 ura4-DS/E ade6-210 otr1(SphI)::ura4<sup>+</sup></i>                             |
| LJ181                      | <i>h<sup>A</sup> rif1Δ::kanR leu1-32 ura4-DS/E ade6-210 otr1(SphI)::ura4<sup>+</sup></i>                            |
| LJ191                      | <i>h<sup>A</sup> abo1Δ::kanR leu1-32 ura4-DS/E ade6-210 otr1(SphI)::ura4<sup>+</sup></i>                            |
| LJ189                      | <i>h<sup>A</sup> abo2Δ::kanR leu1-32 ura4-DS/E ade6-210 otr1(SphI)::ura4<sup>+</sup></i>                            |

| <b>Strains in Figure S9</b> |                                                                                                                                                                                     |
|-----------------------------|-------------------------------------------------------------------------------------------------------------------------------------------------------------------------------------|
| <b><i>mrc1Δ</i> series</b>  |                                                                                                                                                                                     |
| LJ102                       | <i>mat3-M (EcoRV)::ade6<sup>+</sup> (BlnI)::LEU2 mrc1Δ::kanR leu1-32 ura4-D18 ade6-DN/N</i>                                                                                         |
| LJ117                       | <i>(Xmnl)::ura4<sup>+</sup> mat2-P mat3-M (EcoRV)::ade6<sup>+</sup> IR-<math>\Delta</math> (SpeI)::(STAR1) (BlnI)::LEU2 mrc1Δ::kanR leu1-32 ura4-D18 ade6-DN/N arg12Δ::natR</i>     |
| LJ118                       | <i>(Xmnl)::ura4<sup>+</sup> mat2-P mat3-M (EcoRV)::ade6<sup>+</sup> IR-<math>\Delta</math> (SpeI)::(STAR2) (BlnI)::LEU2 mrc1Δ::kanR leu1-32 ura4-D18 ade6-DN/N arg12Δ::natR</i>     |
| LJ114                       | <i>(Xmnl)::ura4<sup>+</sup> mat2-P mat3-M (EcoRV)::ade6<sup>+</sup> IR-<math>\Delta</math> (SpeI)::(STAR3) (BlnI)::LEU2 mrc1Δ::kanR leu1-32 ura4-D18 ade6-DN/N arg12Δ::natR</i>     |
| LJ116                       | <i>mat2-M (Xmnl)::ura4<sup>+</sup> mat3-M (EcoRV)::ade6<sup>+</sup> IR-<math>\Delta</math> (SpeI)::(STAR4) (BlnI)::LEU2 mrc1Δ::kanR leu1-32 ura4-D18 ade6-DN/N arg12Δ::natR</i>     |
| LJ115                       | <i>mat2-M (Xmnl)::ura4<sup>+</sup> mat3-M (EcoRV)::ade6<sup>+</sup> IR-<math>\Delta</math> (SpeI)::(BTH1) (BlnI)::LEU2 mrc1Δ::kanR leu1-32 ura4-D18 ade6-DN/N arg12Δ::natR</i>      |
| LJ119                       | <i>(Xmnl)::ura4<sup>+</sup> mat2-P mat3-M (EcoRV)::ade6<sup>+</sup> IR-<math>\Delta</math> (SpeI)::(rdNA) (BlnI)::LEU2 mrc1Δ::kanR leu1-32 ura4-D18 ade6-DN/N arg12Δ::natR</i>      |
| LJ120                       | <i>(Xmnl)::ura4<sup>+</sup> mat2-P mat3-M (EcoRV)::ade6<sup>+</sup> IR-<math>\Delta</math> (SpeI)::(edge cen1) (BlnI)::LEU2 mrc1Δ::kanR leu1-32 ura4-D18 ade6-DN/N arg12Δ::natR</i> |
| <b><i>pof3Δ</i> series</b>  |                                                                                                                                                                                     |
| LJ220                       | <i>mat3-M (EcoRV)::ade6<sup>+</sup> (BlnI)::LEU2 pof3Δ::kanR leu1-32 ura4-D18 ade6-DN/N</i>                                                                                         |
| LJ224                       | <i>mat3-M (EcoRV)::ade6<sup>+</sup> IR-<math>\Delta</math> (SpeI)::(STAR1) (BlnI)::LEU2 pof3Δ::kanR leu1-32 ura4-D18 ade6-DN/N</i>                                                  |
| LJ225                       | <i>mat3-M (EcoRV)::ade6<sup>+</sup> IR-<math>\Delta</math> (SpeI)::(STAR2) (BlnI)::LEU2 pof3Δ::kanR leu1-32 ura4-D18 ade6-DN/N</i>                                                  |
| LJ221                       | <i>mat3-M (EcoRV)::ade6<sup>+</sup> IR-<math>\Delta</math> (SpeI)::(STAR3) (BlnI)::LEU2 pof3Δ::kanR leu1-32 ura4-D18 ade6-DN/N</i>                                                  |
| LJ223                       | <i>mat3-M (EcoRV)::ade6<sup>+</sup> IR-<math>\Delta</math> (SpeI)::(STAR4) (BlnI)::LEU2 pof3Δ::kanR leu1-32 ura4-D18 ade6-DN/N</i>                                                  |
| LJ222                       | <i>mat3-M (EcoRV)::ade6<sup>+</sup> IR-<math>\Delta</math> (SpeI)::(BTH1) (BlnI)::LEU2 pof3Δ::kanR leu1-32 ura4-D18 ade6-DN/N</i>                                                   |
| LJ226                       | <i>mat3-M (EcoRV)::ade6<sup>+</sup> IR-<math>\Delta</math> (SpeI)::(rdNA) (BlnI)::LEU2 pof3Δ::kanR leu1-32 ura4-D18 ade6-DN/N</i>                                                   |
| <b><i>pob3Δ</i> series</b>  |                                                                                                                                                                                     |
| DN173                       | <i>mat3-M (EcoRV)::ade6<sup>+</sup> (BlnI)::LEU2 pob3Δ::kanR leu1-32 ura4-D18 or DS/E ade6-DN/N</i>                                                                                 |
| DN169                       | <i>(Xmnl)::ura4<sup>+</sup> mat2-P mat3-M (EcoRV)::ade6<sup>+</sup> IR-<math>\Delta</math> (SpeI)::(STAR1) (BlnI)::LEU2 pob3Δ::kanR leu1-32 ura4-D18 or DS/E ade6-DN/N</i>          |
| DN170                       | <i>(Xmnl)::ura4<sup>+</sup> mat2-P mat3-M (EcoRV)::ade6<sup>+</sup> IR-<math>\Delta</math> (SpeI)::(STAR2) (BlnI)::LEU2 pob3Δ::kanR leu1-32 ura4-D18 or DS/E ade6-DN/N</i>          |
| DN166                       | <i>(Xmnl)::ura4<sup>+</sup> mat2-P mat3-M (EcoRV)::ade6<sup>+</sup> IR-<math>\Delta</math> (SpeI)::(STAR3) (BlnI)::LEU2 pob3Δ::kanR leu1-32 ura4-D18 or DS/E ade6-DN/N</i>          |
| DN168                       | <i>(Xmnl)::ura4<sup>+</sup> mat2-P mat3-M (EcoRV)::ade6<sup>+</sup> IR-<math>\Delta</math> (SpeI)::(STAR4) (BlnI)::LEU2 pob3Δ::kanR leu1-32 ura4-D18 or DS/E ade6-DN/N</i>          |
| DN167                       | <i>(Xmnl)::ura4<sup>+</sup> mat2-P mat3-M (EcoRV)::ade6<sup>+</sup> IR-<math>\Delta</math> (SpeI)::(BTH1) (BlnI)::LEU2 pob3Δ::kanR leu1-32 ura4-D18 or DS/E ade6-DN/N</i>           |
| DN171                       | <i>mat2-M (Xmnl)::ura4<sup>+</sup> mat3-M (EcoRV)::ade6<sup>+</sup> IR-<math>\Delta</math> (SpeI)::(rdNA) (BlnI)::LEU2 pob3Δ::kanR leu1-32 ura4-D18 or DS/E ade6-DN/N</i>           |
| DN172                       | <i>(Xmnl)::ura4<sup>+</sup> mat2-P mat3-M (EcoRV)::ade6<sup>+</sup> IR-<math>\Delta</math> (SpeI)::(cen1 NheI) (BlnI)::LEU2 pob3Δ::kanR leu1-32 ura4-D18 or DS/E ade6-DN/N</i>      |

| <b><i>fkh2Δ</i> series</b>   |                                                                                                                                                                    |
|------------------------------|--------------------------------------------------------------------------------------------------------------------------------------------------------------------|
| DN129                        | <i>mat3-M (EcoRV)::ade6<sup>+</sup> (BlnI)::LEU2 fkh2Δ::kanR leu1-32 ura4-D18 or DS/E ade6-DN/N</i>                                                                |
| DN125                        | <i>(Xmnl)::ura4<sup>+</sup> mat2-P mat3-M (EcoRV)::ade6<sup>+</sup> IR-RΔ (SpeI)::(STAR1) (BlnI)::LEU2 fkh2Δ::kanR leu1-32 ura4-D18 or DS/E ade6-DN/N</i>          |
| DN126                        | <i>(Xmnl)::ura4<sup>+</sup> mat2-P mat3-M (EcoRV)::ade6<sup>+</sup> IR-RΔ (SpeI)::(STAR2) (BlnI)::LEU2 fkh2Δ::kanR leu1-32 ura4-D18 or DS/E ade6-DN/N</i>          |
| DN122                        | <i>(Xmnl)::ura4<sup>+</sup> mat2-P mat3-M (EcoRV)::ade6<sup>+</sup> IR-RΔ (SpeI)::(STAR3) (BlnI)::LEU2 fkh2Δ::kanR leu1-32 ura4-D18 or DS/E ade6-DN/N</i>          |
| DN124                        | <i>(Xmnl)::ura4<sup>+</sup> mat2-P mat3-M (EcoRV)::ade6<sup>+</sup> IR-RΔ (SpeI)::(STAR4) (BlnI)::LEU2 fkh2Δ::kanR leu1-32 ura4-D18 or DS/E ade6-DN/N</i>          |
| DN123                        | <i>(Xmnl)::ura4<sup>+</sup> mat2-P mat3-M (EcoRV)::ade6<sup>+</sup> IR-RΔ (SpeI)::(BTH1) (BlnI)::LEU2 fkh2Δ::kanR leu1-32 ura4-D18 or DS/E ade6-DN/N</i>           |
| DN127                        | <i>(Xmnl)::ura4<sup>+</sup> mat2-P mat3-M (EcoRV)::ade6<sup>+</sup> IR-RΔ (SpeI)::(rDNA) (BlnI)::LEU2 fkh2Δ::kanR leu1-32 ura4-D18 or DS/E ade6-DN/N</i>           |
| <b><i>ddb1Δ</i> series</b>   |                                                                                                                                                                    |
| DN105                        | <i>mat3-M (EcoRV)::ade6<sup>+</sup> (BlnI)::LEU2 ddb1Δ::kanR leu1-32 ura4-D18 or DS/E ade6-DN/N</i>                                                                |
| DN101                        | <i>(Xmnl)::ura4<sup>+</sup> mat2-P mat3-M (EcoRV)::ade6<sup>+</sup> IR-RΔ (SpeI)::(STAR1) (BlnI)::LEU2 ddb1Δ::kanR leu1-32 ura4-D18 or DS/E ade6-DN/N</i>          |
| DN102                        | <i>(Xmnl)::ura4<sup>+</sup> mat2-P mat3-M (EcoRV)::ade6<sup>+</sup> IR-RΔ (SpeI)::(STAR2) (BlnI)::LEU2 ddb1Δ::kanR leu1-32 ura4-D18 or DS/E ade6-DN/N</i>          |
| DN98                         | <i>(Xmnl)::ura4<sup>+</sup> mat2-P mat3-M (EcoRV)::ade6<sup>+</sup> IR-RΔ (SpeI)::(STAR3) (BlnI)::LEU2 ddb1Δ::kanR leu1-32 ura4-D18 or DS/E ade6-DN/N</i>          |
| DN100                        | <i>(Xmnl)::ura4<sup>+</sup> mat2-P mat3-M (EcoRV)::ade6<sup>+</sup> IR-RΔ (SpeI)::(STAR4) (BlnI)::LEU2 ddb1Δ::kanR leu1-32 ura4-D18 or DS/E ade6-DN/N</i>          |
| DN101                        | <i>(Xmnl)::ura4<sup>+</sup> mat2-P mat3-M (EcoRV)::ade6<sup>+</sup> IR-RΔ (SpeI)::(BTH1) (BlnI)::LEU2 ddb1Δ::kanR leu1-32 ura4-D18 or DS/E ade6-DN/N</i>           |
| DN103                        | <i>(Xmnl)::ura4<sup>+</sup> mat2-P mat3-M (EcoRV)::ade6<sup>+</sup> IR-RΔ (SpeI)::(rDNA) (BlnI)::LEU2 ddb1Δ::kanR leu1-32 ura4-D18 or DS/E ade6-DN/N</i>           |
| <b>Strains in Figure S10</b> |                                                                                                                                                                    |
| <b><i>def1Δ</i> series</b>   |                                                                                                                                                                    |
| LJ100                        | <i>mat3-M (EcoRV)::ade6<sup>+</sup> (BlnI)::LEU2 def1Δ::kanR leu1-32 ura4-D18 ade6-DN/N</i>                                                                        |
| LJ152                        | <i>(Xmnl)::ura4<sup>+</sup> mat2-P mat3-M (EcoRV)::ade6<sup>+</sup> IR-RΔ (SpeI)::(STAR1) (BlnI)::LEU2 def1Δ::kanR leu1-32 ura4-D18 ade6-DN/N arg12Δ::natR</i>     |
| LJ153                        | <i>(Xmnl)::ura4<sup>+</sup> mat2-P mat3-M (EcoRV)::ade6<sup>+</sup> IR-RΔ (SpeI)::(STAR2) (BlnI)::LEU2 def1Δ::kanR leu1-32 ura4-D18 ade6-DN/N arg12Δ::natR</i>     |
| LJ149                        | <i>(Xmnl)::ura4<sup>+</sup> mat2-P mat3-M (EcoRV)::ade6<sup>+</sup> IR-RΔ (SpeI)::(STAR3) (BlnI)::LEU2 def1Δ::kanR leu1-32 ura4-D18 ade6-DN/N arg12Δ::natR</i>     |
| LJ151                        | <i>(Xmnl)::ura4<sup>+</sup> mat2-P mat3-M (EcoRV)::ade6<sup>+</sup> IR-RΔ (SpeI)::(STAR4) (BlnI)::LEU2 def1Δ::kanR leu1-32 ura4-D18 ade6-DN/N arg12Δ::natR</i>     |
| LJ150                        | <i>(Xmnl)::ura4<sup>+</sup> mat2-P mat3-M (EcoRV)::ade6<sup>+</sup> IR-RΔ (SpeI)::(BTH1) (BlnI)::LEU2 def1Δ::kanR leu1-32 ura4-D18 ade6-DN/N arg12Δ::natR</i>      |
| LJ154                        | <i>(Xmnl)::ura4<sup>+</sup> mat2-P mat3-M (EcoRV)::ade6<sup>+</sup> IR-RΔ (SpeI)::(rDNA) (BlnI)::LEU2 def1Δ::kanR leu1-32 ura4-D18 ade6-DN/N arg12Δ::natR</i>      |
| LJ155                        | <i>(Xmnl)::ura4<sup>+</sup> mat2-P mat3-M (EcoRV)::ade6<sup>+</sup> IR-RΔ (SpeI)::(edge cen1) (BlnI)::LEU2 def1Δ::kanR leu1-32 ura4-D18 ade6-DN/N arg12Δ::natR</i> |

| <b>fft3Δ series</b>   |                                                                                                                                                                                |
|-----------------------|--------------------------------------------------------------------------------------------------------------------------------------------------------------------------------|
| U103                  | <i>mat3-M (EcoRV)::ade6<sup>+</sup> (BplI)::LEU2 fft3Δ::kanR leu1-32 ura4-D18 ade6-DN/N</i>                                                                                    |
| U124                  | <i>(Xmnl)::ura4<sup>+</sup> mat2-P mat3-M (EcoRV)::ade6<sup>+</sup> IR-RΔ (SpeI)::(STAR1) (BplI)::LEU2 fft3Δ::kanR leu1-32 ura4-D18 ade6-DN/N arg12Δ::natR</i>                 |
| U125                  | <i>(Xmnl)::ura4<sup>+</sup> mat2-P mat3-M (EcoRV)::ade6<sup>+</sup> IR-RΔ (SpeI)::(STAR2) (BplI)::LEU2 fft3Δ::kanR leu1-32 ura4-D18 ade6-DN/N arg12Δ::natR</i>                 |
| U121                  | <i>(Xmnl)::ura4<sup>+</sup> mat2-P mat3-M (EcoRV)::ade6<sup>+</sup> IR-RΔ (SpeI)::(STAR3) (BplI)::LEU2 fft3Δ::kanR leu1-32 ura4-D18 ade6-DN/N arg12Δ::natR</i>                 |
| U123                  | <i>(Xmnl)::ura4<sup>+</sup> mat2-P mat3-M (EcoRV)::ade6<sup>+</sup> IR-RΔ (SpeI)::(STAR4) (BplI)::LEU2 fft3Δ::kanR leu1-32 ura4-D18 ade6-DN/N arg12Δ::natR</i>                 |
| U122                  | <i>(Xmnl)::ura4<sup>+</sup> mat2-P mat3-M (EcoRV)::ade6<sup>+</sup> IR-RΔ (SpeI)::(BTH1) (BplI)::LEU2 fft3Δ::kanR ura4-leu1-32 D18 ade6-DN/N arg12Δ::natR</i>                  |
| U126                  | <i>(Xmnl)::ura4<sup>+</sup> mat2-P mat3-M (EcoRV)::ade6<sup>+</sup> IR-RΔ (SpeI)::(rDNA) (BplI)::LEU2 fft3Δ::kanR leu1-32 ura4-D18 ade6-DN/N arg12Δ::natR</i>                  |
| U127                  | <i>(Xmnl)::ura4<sup>+</sup> mat2-P mat3-M (EcoRV)::ade6<sup>+</sup> IR-RΔ (SpeI)::(edge of cen1 RHS NheI) (BplI)::LEU2 fft3Δ::kanR leu1-32 ura4-D18 ade6-DN/N arg12Δ::natR</i> |
| <b>fkbp39Δ series</b> |                                                                                                                                                                                |
| U104                  | <i>mat3-M (EcoRV)::ade6<sup>+</sup> (BplI)::LEU2 fkbp39Δ::kanR leu1-32 ura4-D18 ade6-DN/N</i>                                                                                  |
| U131                  | <i>(Xmnl)::ura4<sup>+</sup> mat2-P mat3-M (EcoRV)::ade6<sup>+</sup> IR-RΔ (SpeI)::(STAR1) (BplI)::LEU2 fkbp39Δ::kanR leu1-32 ura4-D18 ade6-DN/N arg12Δ::natR</i>               |
| U132                  | <i>(Xmnl)::ura4<sup>+</sup> mat2-P mat3-M (EcoRV)::ade6<sup>+</sup> IR-RΔ (SpeI)::(STAR2) (BplI)::LEU2 fkbp39Δ::kanR leu1-32 ura4-D18 ade6-DN/N arg12Δ::natR</i>               |
| U128                  | <i>(Xmnl)::ura4<sup>+</sup> mat2-P mat3-M (EcoRV)::ade6<sup>+</sup> IR-RΔ (SpeI)::(STAR3) (BplI)::LEU2 fkbp39Δ::kanR leu1-32 ura4-D18 ade6-DN/N arg12Δ::natR</i>               |
| U130                  | <i>(Xmnl)::ura4<sup>+</sup> mat2-P mat3-M (EcoRV)::ade6<sup>+</sup> IR-RΔ (SpeI)::(STAR4) (BplI)::LEU2 fkbp39Δ::kanR ura4-D18 ade6-DN/N arg12Δ::natR</i>                       |
| U129                  | <i>(Xmnl)::ura4<sup>+</sup> mat2-P mat3-M (EcoRV)::ade6<sup>+</sup> IR-RΔ (SpeI)::(BTH1) (BplI)::LEU2 fkbp39Δ::kanR leu1-32 ura4-D18 ade6-DN/N arg12Δ::natR</i>                |
| U133                  | <i>(Xmnl)::ura4<sup>+</sup> mat2-P mat3-M (EcoRV)::ade6<sup>+</sup> IR-RΔ (SpeI)::(rDNA) (BplI)::LEU2 fkbp39Δ::kanR leu1-32 ura4-D18 ade6-DN/N arg12Δ::natR</i>                |
| U134                  | <i>(Xmnl)::ura4<sup>+</sup> mat2-P mat3-M (EcoRV)::ade6<sup>+</sup> IR-RΔ (SpeI)::(edge cen1) (BplI)::LEU2 fkbp39Δ::kanR leu1-32 ura4-D18 ade6-DN/N arg12Δ::natR</i>           |
| <b>ssz1Δ series</b>   |                                                                                                                                                                                |
| U203                  | <i>mat3-M (EcoRV)::ade6<sup>+</sup> (BplI)::LEU2 ssz1Δ::kanR leu1-32 ura4-D18 ade6-DN/N</i>                                                                                    |
| U202                  | <i>(Xmnl)::ura4<sup>+</sup> mat2-P mat3-M (EcoRV)::ade6<sup>+</sup> IR-RΔ (SpeI)::(STAR1) (BplI)::LEU2 ssz1Δ::kanR leu1-32 ura4-D18 ade6-DN/N arg12Δ::natR?</i>                |
| U111                  | <i>(Xmnl)::ura4<sup>+</sup> mat2-P mat3-M (EcoRV)::ade6<sup>+</sup> IR-RΔ (SpeI)::(STAR2) (BplI)::LEU2 ssz1Δ::kanR leu1-32 ura4-D18 ade6-DN/N arg12Δ::natR</i>                 |
| U107                  | <i>(Xmnl)::ura4<sup>+</sup> mat2-P mat3-M (EcoRV)::ade6<sup>+</sup> IR-RΔ (SpeI)::(STAR3) (BplI)::LEU2 ssz1Δ::kanR leu1-32 ura4-D18 ade6-DN/N arg12Δ::natR</i>                 |
| U109                  | <i>(Xmnl)::ura4<sup>+</sup> mat2-P mat3-M (EcoRV)::ade6<sup>+</sup> IR-RΔ (SpeI)::(STAR4) (BplI)::LEU2 ssz1Δ::kanR leu1-32 ura4-D18 ade6-DN/N arg12Δ::natR</i>                 |
| U108                  | <i>(Xmnl)::ura4<sup>+</sup> mat2-P mat3-M (EcoRV)::ade6<sup>+</sup> IR-RΔ (SpeI)::(BTH1) (BplI)::LEU2 ssz1Δ::kanR leu1-32 ura4-D18 ade6-DN/N arg12Δ::natR</i>                  |
| U112                  | <i>(Xmnl)::ura4<sup>+</sup> mat2-P mat3-M (EcoRV)::ade6<sup>+</sup> IR-RΔ (SpeI)::(rDNA) (BplI)::LEU2 ssz1Δ::kanR leu1-32 ura4-D18 ade6-DN/N arg12Δ::natR</i>                  |
| U113                  | <i>(Xmnl)::ura4<sup>+</sup> mat2-P mat3-M (EcoRV)::ade6<sup>+</sup> IR-RΔ (SpeI)::(edge cen1) (BplI)::LEU2 ssz1Δ::kanR leu1-32 ura4-D18 ade6-DN/N arg12Δ::natR</i>             |



| <b>abo1Δ series</b>          |                                                                                                                                                       |
|------------------------------|-------------------------------------------------------------------------------------------------------------------------------------------------------|
| LJ199                        | <i>mat3-M (EcoRV)::ade6<sup>+</sup> (BlnI)::LEU2 abo1Δ::kanR leu1-32 ura4-D18 ade6-DN/N</i>                                                           |
| DB44                         | <i>(Xmnl)::ura4<sup>+</sup> mat2-P mat3-M (EcoRV)::ade6 IR-RΔ (SpeI)::(STAR1) (BlnI)::LEU2 leu1-32 ura4-D18 ade6-DN/N abo1Δ::kanR</i>                 |
| DB45                         | <i>(Xmnl)::ura4<sup>+</sup> mat2-P mat3-M (EcoRV)::ade6 IR-RΔ (SpeI)::(STAR2) (BlnI)::LEU2 leu1-32 ura4-D18 ade6-DN/N abo1Δ::kanR</i>                 |
| DB41                         | <i>(Xmnl)::ura4<sup>+</sup> mat2-P mat3-M (EcoRV)::ade6 IR-RΔ (SpeI)::(STAR3) (BlnI)::LEU2 leu1-32 ura4-D18 ade6-DN/N abo1Δ::kanR</i>                 |
| DB43                         | <i>(Xmnl)::ura4<sup>+</sup> mat2-P mat3-M (EcoRV)::ade6 IR-RΔ (SpeI)::(STAR4) (BlnI)::LEU2 leu1-32 ura4-D18 ade6-DN/N abo1Δ::kanR</i>                 |
| DB42                         | <i>(Xmnl)::ura4<sup>+</sup> mat2-P mat3-M (EcoRV)::ade6 IR-RΔ (SpeI):( BTH1 ) (BlnI)::LEU2 leu1-32 ura4-D18 ade6-DN/N abo1Δ::kanR</i>                 |
| DB46                         | <i>(Xmnl)::ura4<sup>+</sup> mat2-P mat3-M (EcoRV)::ade6 IR-RΔ (SpeI):(rDNA) (BlnI)::LEU2 leu1-32 ura4-D18 ade6-DN/N abo1Δ::kanR</i>                   |
| <b>abo2Δ series</b>          |                                                                                                                                                       |
| LJ105                        | <i>mat3-M (EcoRV)::ade6<sup>+</sup> (BlnI)::LEU2 abo2Δ::kanR leu1-32 ura4-D18 ade6-DN/N</i>                                                           |
| DB52                         | <i>(Xmnl)::ura4<sup>+</sup> mat2-P mat3-M (EcoRV)::ade6 IR-RΔ (SpeI)::(STAR1) (BlnI)::LEU2 leu1-32 ura4-D18 ade6-DN/N abo2Δ::kanR</i>                 |
| DB53                         | <i>(Xmnl)::ura4<sup>+</sup> mat2-P mat3-M (EcoRV)::ade6 IR-RΔ (SpeI)::(STAR2) (BlnI)::LEU2 leu1-32 ura4-D18 ade6-DN/N abo2Δ::kanR</i>                 |
| DB49                         | <i>(Xmnl)::ura4<sup>+</sup> mat2-P mat3-M (EcoRV)::ade6 IR-RΔ (SpeI)::(STAR3) (BlnI)::LEU2 leu1-32 ura4-D18 ade6-DN/N abo2Δ::kanR</i>                 |
| DB51                         | <i>(Xmnl)::ura4<sup>+</sup> mat2-P mat3-M (EcoRV)::ade6 IR-RΔ (SpeI)::(STAR4) (BlnI)::LEU2 leu1-32 ura4-D18 ade6-DN/N abo2Δ::kanR</i>                 |
| DB50                         | <i>(Xmnl)::ura4<sup>+</sup> mat2-P mat3-M (EcoRV)::ade6 IR-RΔ (SpeI):( BTH1 ) (BlnI)::LEU2 leu1-32 ura4-D18 ade6-DN/N abo2Δ::kanR</i>                 |
| DB54                         | <i>(Xmnl)::ura4<sup>+</sup> mat2-P mat3-M (EcoRV)::ade6 IR-RΔ (SpeI):(rDNA) (BlnI)::LEU2 leu1-32 ura4-D18 ade6-DN/N abo2Δ::kanR</i>                   |
| <b>Strains in Figure S11</b> |                                                                                                                                                       |
| <b>gcn5Δ series</b>          |                                                                                                                                                       |
| PA91                         | <i>(Xmnl)::ura4<sup>+</sup> mat2-P mat3-M (EcoRV)::ade6<sup>+</sup> gcn5Δ::kanR leu1-32 ura4-D18 ade6-DN/N</i>                                        |
| PA92                         | <i>(Xmnl)::ura4<sup>+</sup> mat2-P mat3-M (EcoRV)::ade6<sup>+</sup> IR-RΔ (SpeI)::(STAR1) (BlnI)::LEU2 gcn5Δ::kanR leu1-32 ura4-D18 ade6-DN/N</i>     |
| PA93                         | <i>(Xmnl)::ura4<sup>+</sup> mat2-P mat3-M (EcoRV)::ade6<sup>+</sup> IR-RΔ (SpeI)::(STAR2) (BlnI)::LEU2 gcn5Δ::kanR leu1-32 ura4-D18 ade6-DN/N</i>     |
| PA94                         | <i>(Xmnl)::ura4<sup>+</sup> mat2-P mat3-M (EcoRV)::ade6<sup>+</sup> IR-RΔ (SpeI)::(STAR3) (BlnI)::LEU2 gcn5Δ::kanR leu1-32 ura4-D18 ade6-DN/N</i>     |
| PA95                         | <i>(Xmnl)::ura4<sup>+</sup> mat2-P mat3-M (EcoRV)::ade6<sup>+</sup> IR-RΔ (SpeI)::(STAR4) (BlnI)::LEU2 gcn5Δ::kanR leu1-32 ura4-D18 ade6-DN/N</i>     |
| PA96                         | <i>(Xmnl)::ura4<sup>+</sup> mat2-P mat3-M (EcoRV)::ade6<sup>+</sup> IR-RΔ (SpeI)::(BTH1) (BlnI)::LEU2 gcn5Δ::kanR leu1-32 ura4-D18 ade6-DN/N</i>      |
| PA97                         | <i>(Xmnl)::ura4<sup>+</sup> mat2-P mat3-M (EcoRV)::ade6<sup>+</sup> IR-RΔ (SpeI)::(rDNA) (BlnI)::LEU2 gcn5Δ::kanR leu1-32 ura4-D18 ade6-DN/N</i>      |
| PA98                         | <i>(Xmnl)::ura4<sup>+</sup> mat2-P mat3-M (EcoRV)::ade6<sup>+</sup> IR-RΔ (SpeI)::(edge cen1) (BlnI)::LEU2 gcn5Δ::kanR leu1-32 ura4-D18 ade6-DN/N</i> |

| <b>not2Δ series</b> |                                                                                                                                                               |
|---------------------|---------------------------------------------------------------------------------------------------------------------------------------------------------------|
| DB105               | <i>mat3-M (EcoRV)::ade6<sup>+</sup> (BlnI)::LEU2 not2Δ::kanR leu1-32 ura4-D18 or DS/E ade6-DN/N</i>                                                           |
| DB4                 | <i>(Xmnl)::ura4<sup>+</sup> mat2-P mat3-M (EcoRV)::ade6<sup>+</sup> IR-RΔ (SpeI)::(STAR1) (BlnI)::LEU2 not2Δ::kanR leu1-32 ura4-D18 ade6-DN/N</i>             |
| DB5                 | <i>(Xmnl)::ura4<sup>+</sup> mat2-P mat3-M (EcoRV)::ade6<sup>+</sup> IR-RΔ (SpeI)::(STAR2) (BlnI)::LEU2 not2Δ::kanR leu1-32 ura4-D18 ade6-DN/N</i>             |
| DB1                 | <i>(Xmnl)::ura4<sup>+</sup> mat2-P mat3-M (EcoRV)::ade6<sup>+</sup> IR-RΔ (SpeI)::(STAR3) (BlnI)::LEU2 not2Δ::kanR leu1-32 ura4-D18 ade6-DN/N</i>             |
| DB3                 | <i>(Xmnl)::ura4<sup>+</sup> mat2-P mat3-M (EcoRV)::ade6<sup>+</sup> IR-RΔ (SpeI)::(STAR4) (BlnI)::LEU2 not2Δ::kanR leu1-32 ura4-D18 ade6-DN/N</i>             |
| DB2                 | <i>(Xmnl)::ura4<sup>+</sup> mat2-P mat3-M (EcoRV)::ade6<sup>+</sup> IR-RΔ (SpeI)::(BTH1) (BlnI)::LEU2 not2Δ::kanR leu1-32 ura4-D18 ade6-DN/N</i>              |
| DB6                 | <i>(Xmnl)::ura4<sup>+</sup> mat2-P mat3-M (EcoRV)::ade6<sup>+</sup> IR-RΔ (SpeI)::(rDNA) (BlnI)::LEU2 not2Δ::kanR leu1-32 ura4-D18 ade6-DN/N</i>              |
| DB7                 | <i>(Xmnl)::ura4<sup>+</sup> mat2-P mat3-M (EcoRV)::ade6<sup>+</sup> IR-RΔ (SpeI)::(edge cen1) (BlnI)::LEU2 not2Δ::kanR leu1-32 ura4-D18 ade6-DN/N</i>         |
| <b>cph1Δ series</b> |                                                                                                                                                               |
| DN121               | <i>mat3-M (EcoRV)::ade6<sup>+</sup> (BlnI)::LEU2 cph1Δ::kanR leu1-32 ura4-D18 or DS/E ade6-DN/N</i>                                                           |
| DN117               | <i>(Xmnl)::ura4<sup>+</sup> mat2-P mat3-M (EcoRV)::ade6<sup>+</sup> IR-RΔ (SpeI)::(STAR1) (BlnI)::LEU2 cph1Δ::kanR leu1-32 ura4-D18 or DS/E ade6-DN/N</i>     |
| DN118               | <i>(Xmnl)::ura4<sup>+</sup> mat2-P mat3-M (EcoRV)::ade6<sup>+</sup> IR-RΔ (SpeI)::(STAR2) (BlnI)::LEU2 cph1Δ::kanR leu1-32 ura4-D18 or DS/E ade6-DN/N</i>     |
| DN114               | <i>(Xmnl)::ura4<sup>+</sup> mat2-P mat3-M (EcoRV)::ade6<sup>+</sup> IR-RΔ (SpeI)::(STAR3) (BlnI)::LEU2 cph1Δ::kanR leu1-32 ura4-D18 or DS/E ade6-DN/N</i>     |
| DN116               | <i>(Xmnl)::ura4<sup>+</sup> mat2-P mat3-M (EcoRV)::ade6<sup>+</sup> IR-RΔ (SpeI)::(STAR4) (BlnI)::LEU2 cph1Δ::kanR leu1-32 ura4-D18 or DS/E ade6-DN/N</i>     |
| DN115               | <i>(Xmnl)::ura4<sup>+</sup> mat2-P mat3-M (EcoRV)::ade6<sup>+</sup> IR-RΔ (SpeI)::(BTH1) (BlnI)::LEU2 cph1Δ::kanR leu1-32 ura4-D18 or DS/E ade6-DN/N</i>      |
| DN119               | <i>(Xmnl)::ura4<sup>+</sup> mat2-P mat3-M (EcoRV)::ade6<sup>+</sup> IR-RΔ (SpeI)::(rDNA) (BlnI)::LEU2 cph1Δ::kanR leu1-32 ura4-D18 or DS/E ade6-DN/N</i>      |
| DN120               | <i>(Xmnl)::ura4<sup>+</sup> mat2-P mat3-M (EcoRV)::ade6<sup>+</sup> IR-RΔ (SpeI)::(edge cen1) (BlnI)::LEU2 cph1Δ::kanR leu1-32 ura4-D18 or DS/E ade6-DN/N</i> |
| <b>rcd1Δ series</b> |                                                                                                                                                               |
| DB112               | <i>mat3-M (EcoRV)::ade6<sup>+</sup> (BlnI)::LEU2 rcd1Δ::kanR leu1-32 ura4-D18 or DS/E ade6-DN/N</i>                                                           |
| DB60                | <i>(Xmnl)::ura4<sup>+</sup> mat2-P mat3-M (EcoRV)::ade6<sup>+</sup> IR-RΔ (SpeI)::(STAR1) (BlnI)::LEU2 rcd1Δ::kanR leu1-32 ura4-D18 ade6-DN/N</i>             |
| DB61                | <i>(Xmnl)::ura4<sup>+</sup> mat2-P mat3-M (EcoRV)::ade6<sup>+</sup> IR-RΔ (SpeI)::(STAR2) (BlnI)::LEU2 rcd1Δ::kanR leu1-32 ura4-D18 ade6-DN/N</i>             |
| DB57                | <i>(Xmnl)::ura4<sup>+</sup> mat2-P mat3-M (EcoRV)::ade6<sup>+</sup> IR-RΔ (SpeI)::(STAR3) (BlnI)::LEU2 rcd1Δ::kanR leu1-32 ura4-D18 ade6-DN/N</i>             |
| DB59                | <i>(Xmnl)::ura4<sup>+</sup> mat2-P mat3-M (EcoRV)::ade6<sup>+</sup> IR-RΔ (SpeI)::(STAR4) (BlnI)::LEU2 rcd1Δ::kanR leu1-32 ura4-D18 ade6-DN/N</i>             |
| DB58                | <i>(Xmnl)::ura4<sup>+</sup> mat2-P mat3-M (EcoRV)::ade6<sup>+</sup> IR-RΔ (SpeI)::(BTH1) (BlnI)::LEU2 rcd1Δ::kanR leu1-32 ura4-D18 ade6-DN/N</i>              |
| DB62                | <i>(Xmnl)::ura4<sup>+</sup> mat2-P mat3-M (EcoRV)::ade6<sup>+</sup> IR-RΔ (SpeI)::(rDNA) (BlnI)::LEU2 rcd1Δ::kanR leu1-32 ura4-D18 ade6-DN/N</i>              |
| DB63                | <i>(Xmnl)::ura4<sup>+</sup> mat2-P mat3-M (EcoRV)::ade6<sup>+</sup> IR-RΔ (SpeI)::(cen1 NheI) (BlnI)::LEU2 rcd1Δ::kanR leu1-32 ura4-D18 ade6-DN/N</i>         |

| <b>btf3Δ series</b> |                                                                                                                                                       |
|---------------------|-------------------------------------------------------------------------------------------------------------------------------------------------------|
| DB16                | <i>mat3-M (EcoRV)::ade6<sup>+</sup> (BlnI)::LEU2 btf3Δ::kanR leu1-32 ura4-D18 ade6-DN/N</i>                                                           |
| DB20                | <i>(Xmnl)::ura4<sup>+</sup> mat2-P mat3-M (EcoRV)::ade6<sup>+</sup> IR-RΔ (SpeI)::(STAR1) (BlnI)::LEU2 btf3Δ::kanR leu1-32 ura4-D18 ade6-DN/N</i>     |
| DB21                | <i>(Xmnl)::ura4<sup>+</sup> mat2-P mat3-M (EcoRV)::ade6<sup>+</sup> IR-RΔ (SpeI)::(STAR2) (BlnI)::LEU2 btf3Δ::kanR leu1-32 ura4-D18 ade6-DN/N</i>     |
| DB17                | <i>(Xmnl)::ura4<sup>+</sup> mat2-P mat3-M (EcoRV)::ade6<sup>+</sup> IR-RΔ (SpeI)::(STAR3) (BlnI)::LEU2 btf3Δ::kanR leu1-32 ura4-D18 ade6-DN/N</i>     |
| DB19                | <i>(Xmnl)::ura4<sup>+</sup> mat2-P mat3-M (EcoRV)::ade6<sup>+</sup> IR-RΔ (SpeI)::(STAR4) (BlnI)::LEU2 btf3Δ::kanR leu1-32 ura4-D18 ade6-DN/N</i>     |
| DB18                | <i>(Xmnl)::ura4<sup>+</sup> mat2-P mat3-M (EcoRV)::ade6<sup>+</sup> IR-RΔ (SpeI)::(BTH1) (BlnI)::LEU2 btf3Δ::kanR leu1-32 ura4-D18 ade6-DN/N</i>      |
| DB22                | <i>(Xmnl)::ura4<sup>+</sup> mat2-P mat3-M (EcoRV)::ade6<sup>+</sup> IR-RΔ (SpeI)::(rDNA) (BlnI)::LEU2 btf3Δ::kanR leu1-32 ura4-D18 ade6-DN/N</i>      |
| DB23                | <i>(Xmnl)::ura4<sup>+</sup> mat2-P mat3-M (EcoRV)::ade6<sup>+</sup> IR-RΔ (SpeI)::(cen1 NheI) (BlnI)::LEU2 btf3Δ::kanR leu1-32 ura4-D18 ade6-DN/N</i> |
| <b>ckb1Δ series</b> |                                                                                                                                                       |
| DN97                | <i>mat3-M (EcoRV)::ade6<sup>+</sup> (BlnI)::LEU2 ckb1Δ::kanR leu1-32 ura4-D18 or DS/E ade6-DN/N</i>                                                   |
| DN93                | <i>(Xmnl)::ura4<sup>+</sup> mat2-P mat3-M (EcoRV)::ade6<sup>+</sup> IR-RΔ (SpeI)::(STAR1) (BlnI)::LEU2 ckb1Δ::kanR ura4-D18 or DS/E ade6-DN/N</i>     |
| DN94                | <i>(Xmnl)::ura4<sup>+</sup> mat2-P mat3-M (EcoRV)::ade6<sup>+</sup> IR-RΔ (SpeI)::(STAR2) (BlnI)::LEU2 ckb1Δ::kanR ura4-D18 or DS/E ade6-DN/N</i>     |
| DN90                | <i>(Xmnl)::ura4<sup>+</sup> mat2-P mat3-M (EcoRV)::ade6<sup>+</sup> IR-RΔ (SpeI)::(STAR3) (BlnI)::LEU2 ckb1Δ::kanR ura4-D18 or DS/E ade6-DN/N</i>     |
| DN92                | <i>(Xmnl)::ura4<sup>+</sup> mat2-P mat3-M (EcoRV)::ade6<sup>+</sup> IR-RΔ (SpeI)::(STAR4) (BlnI)::LEU2 ckb1Δ::kanR ura4-D18 or DS/E ade6-DN/N</i>     |
| DN91                | <i>(Xmnl)::ura4<sup>+</sup> mat2-P mat3-M (EcoRV)::ade6<sup>+</sup> IR-RΔ (SpeI)::(BTH1) (BlnI)::LEU2 ckb1Δ::kanR ura4-D18 or DS/E ade6-DN/N</i>      |
| DN95                | <i>(Xmnl)::ura4<sup>+</sup> mat2-P mat3-M (EcoRV)::ade6<sup>+</sup> IR-RΔ (SpeI)::(rDNA) (BlnI)::LEU2 ckb1Δ::kanR ura4-D18 or DS/E ade6-DN/N</i>      |

**Table S4.** Oligonucleotide sequences.

| Oligonucleotide                                                                           | Sequence                      |
|-------------------------------------------------------------------------------------------|-------------------------------|
| <b>Confirmation of Bioneer ORF deletions</b>                                              |                               |
| Cp-N10 (GTO-596)                                                                          | GATGTGAGAAGTGTATCCTAGCAAG     |
| Cp-C3 (GTO-597)                                                                           | GGCTGGCCTGTTGAACAAGTCTGGA     |
| Cp5-mcl1D                                                                                 | CGAGAATCTCACACAGTTCTACAGC     |
| Cp3-mcl1D                                                                                 | GCCAGAACTTTGGGCGTTAGCTC       |
| Cp5-wpl1D                                                                                 | GGTGGCTCAATAATGGCCGCATTCCG    |
| Cp3-wpl1D                                                                                 | GGCGATAACACAACCCTTTCCATC      |
| Cp5-dpb4D                                                                                 | GTTCGAGGAGATGGTTAGAAGCAAGTG   |
| Cp3-dpb4D                                                                                 | CTGGACAGTAAACACCGATTAGGATG    |
| GTO-598 pli1 (03-81) c                                                                    | GCTGCCCGTAGTCTAATCAATCATT     |
| GTO-599 ckb1 (04-23) c                                                                    | CTACAAAGTGTCACTGTCACACCTG     |
| GTO-600 abo1 (05-33)                                                                      | TACACGCGCATATCCTGTGTGCGTG     |
| GTO-601 pdr13 (06-02)                                                                     | GCATGTGGTGATAACACAGATAGTAG    |
| GTO-602 mrc1 (06-19) c                                                                    | GGCAACGTTTATGGTGATATGACTG     |
| GTO-603 rhp18 (07-46)                                                                     | GGTACATCTAGAAATCTTCACATGC     |
| GTO-604 ppo1 (07-80) c                                                                    | GCATTGCCAGATTGATGTAGCTTGC     |
| GTO-605 mit1 (09-32) c                                                                    | GTATCCGCAAATACCTATATGGCTC     |
| GTO-606 ddb1 (10-52) c                                                                    | GAATATCCTGTTAATGCAATCAC       |
| GTO-607 pof3 (11-94) c                                                                    | GCTTCAGTGCAAAATAGTAAACACC     |
| GTO-608 ccq1 (14-25) c                                                                    | CCTTATAAGAGCCAGAATGAATTGC     |
| GTO-609 cdt2 (14-69) c                                                                    | GGGTCCTGCAAGGTGAACAGCTAAC     |
| GTO-610 rtf1 (14-80) c                                                                    | GATATGAGGCAGATACCTGTAAACG     |
| GTO-611 rnc1 (17-85) c                                                                    | CTTCCAAAGATATAACGACTGAGGC     |
| GTO-612 csn1 (22-54) c                                                                    | GAATACATGGGGTTCTAATCTTGG      |
| GTO-613 meu6 (26-47) c                                                                    | CGCAGACAGCTCGATTCCAGAAG       |
| GTO-614 pob3 (26-94) c                                                                    | CGTAGGAGACAATATGGGAATCCCG     |
| GTO-615 did2 (29-18) c                                                                    | GGTTGAAGAGCGGTGTCCTTTGC       |
| GTO-616 spc19 (29-55)                                                                     | CCGAAGGATTGTGTAGTTTACACAGG    |
| GTO-617 cph1 (29-75) c                                                                    | GCGTTTTAAACCATTGATATGGCTG     |
| GTO-618 fft3 (30-11) c                                                                    | CTAGGTGAAGTGCTTTCCTCTGTC      |
| GTO-619 fkbp39 (30-46) c                                                                  | CTGCAATCCCTACTGGGCGTCGACGC    |
| GTO-620 msh6 (31-89) c                                                                    | CAGAGGATTGTTGGCAGGATCTTGG     |
| GTO-621 wpl1 (32-77) c                                                                    | GCTGTAAACGAGTACATAGCCATGG     |
| <b>PCR amplification of <i>mcl1Δ::kanR</i>, <i>wpl1Δ::kanR</i> and <i>dpb4Δ::kanR</i></b> |                               |
| GTO-1332                                                                                  | CCTGTGAGGCTCCACTAGGTTTCTC     |
| GTO-1333                                                                                  | CTGTTGCTCGTTCAATTCATCGCCTAC   |
| GTO-1363                                                                                  | CTAGTTATAAAGGGAAGTCGGTCTTCAC  |
| GTO-1364                                                                                  | CTTCTGCTTTCACTGGAATAGCAACATC  |
| GTO-1365                                                                                  | GAGCGTGTGCGTTTGTGACGCGTCGC    |
| GTO-1366                                                                                  | CGTTATGGCGAGCTGAAGCTTCTGTCC   |
| <b>RT-QPCR for <i>ade6</i> and <i>act1</i></b>                                            |                               |
| GTO-218                                                                                   | GGCTCGAGCCCGGGCATGGAAATTGCAG  |
| GTO-219                                                                                   | GGGGATCCATGGCAAAGGGTTTGAGCAGC |
| TJO-55                                                                                    | CTGTTTTGTCTTTGTATGCC          |
| TJO-58                                                                                    | TAAGGTAGTCAGTCAAGTCA          |

| <b>Identification of <i>ade6-DN/N</i> allele</b> |                         |
|--------------------------------------------------|-------------------------|
| GTO-232                                          | CATTGGCTTACGACGGTCGTGG  |
| GTO-233                                          | CCACATATGGCCCGTAAGTGAGC |
